# Supplementary material for: The neck as a keystone structure in avian macroevolution and mosaicism
Source: PubMed Central journal article supplement (PMC10576348; doi:10.1186/s12915-023-01715-x), 2023-10-13
Supplement: 12915_2023_1715_MOESM1_ESM.pdf [file 12915_2023_1715_MOESM1_ESM.pdf]

**Additional File 1 for Marek & Felice 'The neck as a keystone structure in avian macroevolution and mosaicism'**

**Table S1.** Specimens studied with associated metadata (including forelimb proportion data, forelimb element length is adjusted for body mass).

| Species                             | Source                       | Diet               | Foraging            | Flesh      | Water       | Body mass (kg) | Coracoid length | Scapula length | Humerus length | Radius length | Ulna length | Carpometacarpus length | Head mass (% of body mass) | Brachial index | Coracoid:humerus | Coracoid:scapula | Ulna:CMC    | Proximal  | Distal     | Proximal:distal |
|-------------------------------------|------------------------------|--------------------|---------------------|------------|-------------|----------------|-----------------|----------------|----------------|---------------|-------------|------------------------|----------------------------|----------------|------------------|------------------|-------------|-----------|------------|-----------------|
| <i>Acanthorhynchus tenuirostris</i> | MorphoSource (ID: 000125748) | Nectar             | Foraging generalist | Non-fleshy | Non-aquatic | 0.022638711    | 0.053753004     | 0.05824714     | 0.051122844    | 0.058282046   | 0.066067808 | 0.03676395             | 6.852342432                | 0.773793548    | 1.051447845      | 0.922843668      | 1.797081359 | 0.0467322 | 0.0461566  | 1.012470589     |
| <i>Agelaius phoeniceus</i>          | MorphoSource (ID: 000073651) | Seeds              | Ground foraging     | Non-fleshy | Non-aquatic | 0.260386577    | 0.040015609     | 0.044813273    | 0.044274015    | 0.045604777   | 0.052365065 | 0.029115088            | 2.320793979                | 0.845487646    | 0.903817036      | 0.892941009      | 1.798554256 | 0.0828114 | 0.081517   | 1.015878896     |
| <i>Aptenodytes patagonicus</i>      | MorphoSource (ID: 000375475) | Aquatic animals    | Aquatic dive        | Flesh      | Aquatic     | 1.627086813    | 0.058174936     | 0.081786843    | 0.050751899    | 0.036040635   | 0.036539314 | 0.030890513            | 3.714775789                | 1.388966965    | 1.146261249      | 0.711299437      | 1.182865224 | 0.2239481 | 0.12150158 | 1.84317027      |
| <i>Ardeotis kori</i>                | MorphoSource (ID: 000125660) | Generalist         | Ground foraging     | Non-fleshy | Non-aquatic | 6.201364568    | 0.049231246     | 0.065210301    | 0.117577985    | 0.1255412     | 0.132988008 | 0.058003952            | 2.57503803                 | 0.884124715    | 0.418711427      | 0.754961181      | 2.292740471 | 0.4236872 | 0.5780162  | 0.733002293     |
| <i>Atlapetes leucopterus</i>        | MorphoSource (ID: 000371807) | Generalist         | Arboreal gleaning   | Non-fleshy | Non-aquatic | 0.013799065    | 0.06390918      | 0.067463572    | 0.068863874    | 0.068729475   | 0.075246819 | 0.041523047            | 2.423388831                | 0.915173231    | 0.928050899      | 0.947313911      | 1.812169954 | 0.0487185 | 0.04513285 | 1.079446567     |
| <i>Baeopogon indicator</i>          | MorphoSource (ID: 000096282) | Fruit              | Arboreal gleaning   | Non-fleshy | Non-aquatic | 0.072285013    | 0.052948523     | 0.057927       | 0.050519846    | 0.058388415   | 0.064521739 | 0.03619908             | 5.047451537                | 0.782989537    | 1.048073707      | 0.914056017      | 1.782413768 | 0.067823  | 0.0668623  | 1.014368336     |
| <i>Bonasa umbellus</i>              | MorphoSource (ID: 000108161) | Terrestrial plants | Ground foraging     | Non-fleshy | Non-aquatic | 0.246505838    | 0.057755949     | 0.079297018    | 0.071367602    | 0.059265762   | 0.067798246 | 0.041370087            | 3.78264591                 | 1.052646737    | 0.809274051      | 0.728349562      | 1.638822911 | 0.1312936 | 0.1061043  | 1.237401312     |
| <i>Calyptromena viridis</i>         | MorphoSource (ID: 000108710) | Fruit              | Aerial sallying     | Non-fleshy | Non-aquatic | 0.764601841    | 0.066346845     | 0.073927612    | 0.076127588    | 0.08844068    | 0.09802956  | 0.051612631            | 1.564161811                | 0.776577876    | 0.871521698      | 0.897456892      | 1.899332738 | 0.1980592 | 0.2179023  | 0.908935794     |
| <i>Caracara cheriway</i>            | MorphoSource (ID: 000125586) | Carrion            | Ground foraging     | Flesh      | Non-aquatic | 1.846087544    | 0.043868775     | 0.051968147    | 0.087453943    | 0.087298581   | 0.092825153 | 0.049102919            | 3.092794715                | 0.942136266    | 0.501621463      | 0.844147373      | 1.890420256 | 0.2243903 | 0.2806263  | 0.799605383     |
| <i>Cathartes burrovianus</i>        | MorphoSource (ID: 000110050) | Carrion            | Ground foraging     | Flesh      | Non-aquatic | 2.236687199    | 0.043454737     | 0.045324585    | 0.10947194     | 0.121458124   | 0.128179014 | 0.060390253            | 2.144010259                | 0.854055098    | 0.396948629      | 0.958745378      | 2.122511604 | 0.2585745 | 0.4043615  | 0.639463698     |
| <i>Charadrius hiaticula</i>         | MorphoSource (ID: 000052994) | Aquatic animals    | Ground foraging     | Flesh      | Aquatic     | 0.082141237    | 0.037048913     | 0.06421518     | 0.071850681    | 0.074144593   | 0.077452117 | 0.044871486            | 5.564630102                | 0.927678727    | 0.515637601      | 0.576949449      | 1.726087642 | 0.0758821 | 0.0861187  | 0.88113383      |
| <i>Chloropsis hardwickii</i>        | MorphoSource (ID: 000078331) | Generalist         | Arboreal gleaning   | Non-fleshy | Non-aquatic | 0.041275152    | 0.058738927     | 0.062862233    | 0.0627208      | 0.063559089   | 0.071966888 | 0.039476315            | 8.75103016                 | 0.871523026    | 0.936514313      | 0.934407265      | 1.823039657 | 0.0643805 | 0.0611253  | 1.053254544     |
| <i>Cisticola chubbii</i>            | MorphoSource (ID: 000072802) | Invertebrates      | Arboreal gleaning   | Non-fleshy | Non-aquatic | 0.041612921    | 0.066648579     | 0.076357522    | 0.07582215     | 0.07141011    | 0.077780899 | 0.040949277            | 1.908734068                | 0.974817094    | 0.879012002      | 0.872848905      | 1.899444964 | 0.0766388 | 0.0665916  | 1.150877889     |
| <i>Conostoma oemodium</i>           | MorphoSource (ID: 000097883) | Generalist         | Arboreal gleaning   | Non-fleshy | Non-aquatic | 0.055554968    | 0.061428249     | 0.059853226    | 0.072996158    | 0.070693322   | 0.081402858 | 0.043631367            | 2.060150588                | 0.896727208    | 0.841527159      | 1.026314762      | 1.865695793 | 0.0748482 | 0.0754068  | 0.99259218      |
| <i>Coracina novaehollandiae</i>     | MorphoSource (ID: 000097881) | Invertebrates      | Foraging generalist | Non-fleshy | Non-aquatic | 0.110326713    | 0.057793501     | 0.061957193    | 0.081448537    | 0.093751888   | 0.103524777 | 0.059834884            | 1.517485616                | 0.786754048    | 0.709570773      | 0.932797279      | 1.730174269 | 0.09721   | 0.1242242  | 0.782536736     |
| <i>Corvus albus</i>                 | MorphoSource (ID: 000375493) | Generalist         | Ground foraging     | Non-fleshy | Non-aquatic | 1.780153699    | 0.053404623     | 0.061763738    | 0.084596588    | 0.100866415   | 0.109226275 | 0.064408854            | 1.760269915                | 0.774507674    | 0.631285779      | 0.864659823      | 1.695827012 | 0.2416408 | 0.3320441  | 0.727737069     |
| <i>Crotophaga ani</i>               | MorphoSource (ID: )          | Generalist         | Arboreal            | Non-       | Non-aquatic | 0.029096241    | 0.076643123     | 0.095571592    | 0.113517794    | 0.08744002    | 0.097065395 | 0.058880393            | 3.379240638                | 1.16949809     | 0.675163959      | 0.801944613      | 1.64851812  | 0.0889254 | 0.0757463  | 1.173990017     |

|                                   |                              |                 |                   |           |             |             |             |             |             |             |             |             |             |             |             |             |             |             |             |             |
|-----------------------------------|------------------------------|-----------------|-------------------|-----------|-------------|-------------|-------------|-------------|-------------|-------------|-------------|-------------|-------------|-------------|-------------|-------------|-------------|-------------|-------------|-------------|
|                                   | 000091735)                   |                 | gleaning          | flesh     |             |             |             |             |             |             |             |             |             |             |             |             |             |             |             |             |
| <b>Crypturellus tataupa</b>       | MorphoSource (ID: 000109590) | Generalist      | Ground foraging   | Non-flesh | Non-aquatic | 0.264289501 | 0.038204814 | 0.058974161 | 0.059855956 | 0.056282855 | 0.060365579 | 0.043280721 | 1.997428948 | 0.991557722 | 0.638279233 | 0.647822293 | 1.394745237 | 0.1012238   | 0.1030894   | 0.981903086 |
| <b>Nectarinia oritis</b>          | MorphoSource (ID: 000073432) | Nectar          | Arboreal gleaning | Non-flesh | Non-aquatic | 0.011223335 | 0.059213086 | 0.062590141 | 0.060012579 | 0.061842569 | 0.069489014 | 0.038264784 | 13.67935645 | 0.863626866 | 0.986677909 | 0.946044936 | 1.816004324 | 0.0413211   | 0.038544    | 1.072050125 |
| <b>Emberiza cabanisi</b>          | MorphoSource (ID: 000057347) | Invertebrates   | Ground foraging   | Non-flesh | Non-aquatic | 0.14826702  | 0.063854281 | 0.054117743 | 0.071186441 | 0.071062721 | 0.080389424 | 0.043156018 | 8.830021673 | 0.885519983 | 0.897000609 | 1.179913967 | 1.862762755 | 0.1007559   | 0.1036587   | 0.971996562 |
| <b>Eubucco bourcierii</b>         | MorphoSource (ID: 000086173) | Fruit           | Arboreal gleaning | Non-flesh | Non-aquatic | 0.035117053 | 0.056881669 | 0.056057564 | 0.060582743 | 0.063459411 | 0.070203845 | 0.030954823 | 11.98090284 | 0.862954774 | 0.938908772 | 1.01470105  | 2.267945291 | 0.0574613   | 0.0545128   | 1.054088214 |
| <b>Euneornis campestris</b>       | MorphoSource (ID: 000095946) | Nectar          | Arboreal gleaning | Non-flesh | Non-aquatic | 0.023261466 | 0.057502644 | 0.059020314 | 0.059884836 | 0.066406978 | 0.074943224 | 0.040422541 | 9.345876997 | 0.79906939  | 0.960220446 | 0.974285631 | 1.853995858 | 0.0509927   | 0.0525435   | 0.970485407 |
| <b>Forpus passerinus</b>          | MorphoSource (ID: 000064737) | Seeds           | Ground foraging   | Non-flesh | Non-aquatic | 0.042617026 | 0.045994784 | 0.047034757 | 0.052443408 | 0.056856564 | 0.062221588 | 0.038665115 | 9.623569228 | 0.842849078 | 0.877036517 | 0.977889272 | 1.609243574 | 0.0513505   | 0.0556818   | 0.922213362 |
| <b>Foudia madagascariensis</b>    | MorphoSource (ID: 000106437) | Seeds           | Arboreal gleaning | Non-flesh | Non-aquatic | 0.014005181 | 0.063644697 | 0.072609188 | 0.065741647 | 0.067708534 | 0.075335182 | 0.041004019 | 15.5608271  | 0.872655313 | 0.968103175 | 0.876537786 | 1.837263351 | 0.0493875   | 0.0449993   | 1.097517072 |
| <b>Fratercula arctica</b>         | MorphoSource (ID: 000086186) | Aquatic animals | Aquatic dive      | Flesh     | Aquatic     | 0.370061447 | 0.041911497 | 0.068802965 | 0.07412969  | 0.055293135 | 0.058699486 | 0.038468525 | 4.664942847 | 1.262867794 | 0.565380719 | 0.609152492 | 1.525909456 | 0.13314844  | 0.10982205  | 1.212401699 |
| <b>Fregata aquila</b>             | MorphoSource (ID: 000092063) | Aquatic animals | Aerial screening  | Flesh     | Aquatic     | 1.431154052 | 0.057760336 | 0.056202917 | 0.15126792  | 0.199071259 | 0.202155268 | 0.092299141 | 5.035534148 | 0.748275923 | 0.38184128  | 1.02771064  | 2.190218317 | 0.298539    | 0.5555028   | 0.537421234 |
| <b>Basilornis mirandus</b>        | MorphoSource (ID: 000096285) | Fruit           | Arboreal gleaning | Non-flesh | Non-aquatic | 0.099890093 | 0.062088208 | 0.06800631  | 0.067725494 | 0.070661767 | 0.079975544 | 0.045892828 | 9.851476462 | 0.846827549 | 0.916762721 | 0.912977162 | 1.742658881 | 0.0924938   | 0.0918907   | 1.006563232 |
| <b>Grus leucogeranus</b>          | MorphoSource (ID: 000109469) | Generalist      | Ground foraging   | Flesh     | Non-aquatic | 2.733135312 | 0.059274652 | 0.081032763 | 0.16323772  | 0.177121498 | 0.183563629 | 0.080444637 | 4.993323946 | 0.889270497 | 0.363118598 | 0.731489955 | 2.281862848 | 0.422981575 | 0.614701873 | 0.888108486 |
| <b>Lophozosterops goodfellowi</b> | MorphoSource (ID: 000159488) | Fruit           | Arboreal gleaning | Non-flesh | Non-aquatic | 0.018259415 | 0.063450232 | 0.068489211 | 0.0646284   | 0.068779849 | 0.074703651 | 0.04165561  | 12.07135059 | 0.865130404 | 0.981770126 | 0.926426684 | 1.793363499 | 0.052456962 | 0.04940704  | 1.061730515 |
| <b>Heterocercus flavivertex</b>   | MorphoSource (ID: 000052923) | Fruit           | Aerial sallying   | Non-flesh | Non-aquatic | 0.025374057 | 0.061867533 | 0.068936314 | 0.07026823  | 0.085803482 | 0.092398219 | 0.046612379 | 12.38105913 | 0.760493343 | 0.880448147 | 0.897459251 | 1.982267798 | 0.059813668 | 0.066876291 | 0.894392327 |
| <b>Heterophasia capistrata</b>    | MorphoSource (ID: 000159441) | Generalist      | Arboreal gleaning | Non-flesh | Non-aquatic | 0.036582791 | 0.060896721 | 0.066681734 | 0.063085268 | 0.065549973 | 0.07389188  | 0.040854843 | 11.05838808 | 0.853751024 | 0.965308105 | 0.913244409 | 1.808644299 | 0.063995498 | 0.060515848 | 1.057499814 |
| <b>Jacamerops aureus</b>          | MorphoSource (ID: 000116074) | Invertebrates   | Aerial sallying   | Non-flesh | Non-aquatic | 0.08440218  | 0.053396849 | 0.066323806 | 0.076584069 | 0.089844798 | 0.09706832  | 0.040894912 | 14.87027231 | 0.788970793 | 0.697231801 | 0.805093249 | 2.373603837 | 0.086821535 | 0.100754798 | 0.861711171 |
| <b>Klais guimeti</b>              | MorphoSource (ID: 000100075) | Nectar          | Aerial screening  | Non-flesh | Non-aquatic | 0.004859027 | 0.037102235 | 0.051997653 | 0.027479786 | 0.025360251 | 0.028975213 | 0.033088675 | 9.087127937 | 0.948389414 | 1.350164645 | 0.713536729 | 0.8756837   | 0.020099447 | 0.015072755 | 1.333495237 |
| <b>Lanius excubitor</b>           | MorphoSource (ID: 000072779) | Vertebrates     | Aerial sallying   | Flesh     | Non-aquatic | 0.042740102 | 0.065273127 | 0.072728565 | 0.075063442 | 0.084182912 | 0.091196968 | 0.053021683 | 2.086174245 | 0.823091421 | 0.869572791 | 0.897489546 | 1.71999384  | 0.075281475 | 0.080700236 | 0.93285322  |
| <b>Lipaugus vociferans</b>        | MorphoSource (ID: 000073648) | Fruit           | Aerial sallying   | Non-flesh | Non-aquatic | 0.065893563 | 0.066801071 | 0.077604079 | 0.077556209 | 0.091982981 | 0.099528976 | 0.054156378 | 1.360263217 | 0.779232464 | 0.8613246   | 0.860793295 | 1.837807096 | 0.090468119 | 0.100130727 | 0.903500071 |

|                                  |                              |                   |                  |           |             |             |             |             |             |             |             |             |             |             |              |             |             |             |             |             |
|----------------------------------|------------------------------|-------------------|------------------|-----------|-------------|-------------|-------------|-------------|-------------|-------------|-------------|-------------|-------------|-------------|--------------|-------------|-------------|-------------|-------------|-------------|
| <b>Micrastur ruficollis</b>      | MorphoSource (ID: 000093346) | Vertebrates       | Aerialsallying   | Flesh     | Non-aquatic | 0.101728773 | 0.069189455 | 0.08398278  | 0.111601051 | 0.112429686 | 0.122185021 | 0.059537821 | 1.827532118 | 0.913377517 | 0.619971357  | 0.82385288  | 2.052225262 | 0.12454624  | 0.13836589  | 0.900122422 |
| <b>Neodrepanis hypoxantha</b>    | MorphoSource (ID: 000042668) | Nectar            | Arborealgleaning | Non-flesh | Non-aquatic | 0.007101578 | 0.060221403 | 0.066374482 | 0.06391465  | 0.072859283 | 0.080772874 | 0.042524021 | 16.8820648  | 0.791288545 | 0.94221595   | 0.907297525 | 1.899464657 | 0.037227691 | 0.038330907 | 0.97121863  |
| <b>Opisthocomus hoazin</b>       | MorphoSource (ID: 000126143) | Terrestrialplants | Arborealgleaning | Non-flesh | Non-aquatic | 0.457190352 | 0.061846519 | 0.078396689 | 0.088011243 | 0.083208217 | 0.089448128 | 0.04662042  | 4.220395272 | 0.983936106 | 0.702711566  | 0.788891976 | 1.918646972 | 0.176299582 | 0.169365362 | 1.040942251 |
| <b>Pandion haliaetus</b>         | MorphoSource (ID: 000093616) | Aquaticanimals    | Aerialscreaming  | Flesh     | Aquatic     | 1.654270045 | 0.041163664 | 0.056393911 | 0.116957368 | 0.144590406 | 0.14960261  | 0.0715235   | 2.687392493 | 0.78178695  | 0.351954433  | 0.729931009 | 2.091656746 | 0.253278115 | 0.431802038 | 0.586560722 |
| <b>Passerina cyanea</b>          | MorphoSource (ID: 000114360) | Seeds             | Groundforaging   | Non-flesh | Non-aquatic | 0.009845551 | 0.069845946 | 0.078992639 | 0.071584356 | 0.076668932 | 0.08458115  | 0.044724245 | 2.018312637 | 0.846339348 | 0.975715232  | 0.884208289 | 1.891170016 | 0.047976217 | 0.0448314   | 1.070147642 |
| <b>Pelecanus occidentalis</b>    | MorphoSource (ID: 000092472) | Aquaticanimals    | Aquaticplunge    | Flesh     | Aquatic     | 5.038209735 | 0.056239383 | 0.051790455 | 0.14409902  | 0.170202368 | 0.174708159 | 0.067828007 | 5.219606087 | 0.824798454 | 0.390282897  | 1.085902459 | 2.575752498 | 0.429906208 | 0.703762592 | 0.610868229 |
| <b>Phaethon lepturus</b>         | MorphoSource (ID: 000092495) | Aquaticanimals    | Aquaticplunge    | Flesh     | Aquatic     | 0.419743229 | 0.05922327  | 0.076788532 | 0.11234152  | 0.11631795  | 0.120869043 | 0.060383705 | 9.622232405 | 0.929448247 | 0.527171699  | 0.771251489 | 2.001683105 | 0.18648959  | 0.223447132 | 0.834602746 |
| <b>Phainopepla nitens</b>        | MorphoSource (ID: 000356971) | Fruit             | Arborealgleaning | Non-flesh | Non-aquatic | 0.041401111 | 0.05082592  | 0.060948138 | 0.06532289  | 0.071808788 | 0.082129404 | 0.043401647 | 6.655422846 | 0.795365439 | 0.778072131  | 0.833920801 | 1.892310768 | 0.061919157 | 0.068996765 | 0.897421162 |
| <b>Philepitta castanea</b>       | MorphoSource (ID: 000042658) | Fruit             | Arborealgleaning | Non-flesh | Non-aquatic | 0.026210622 | 0.06569326  | 0.074208733 | 0.068214696 | 0.079454158 | 0.088180563 | 0.048189801 | 14.67160528 | 0.773579722 | 0.963036768  | 0.885249719 | 1.829859467 | 0.062575514 | 0.064893068 | 0.964286571 |
| <b>Pogoniulus bilineatus</b>     | MorphoSource (ID: 000110058) | Fruit             | Arborealgleaning | Non-flesh | Non-aquatic | 0.016361373 | 0.06065879  | 0.069166743 | 0.063803019 | 0.066802818 | 0.074494815 | 0.03205661  | 11.46325556 | 0.856475969 | 0.950719749  | 0.876993583 | 2.323851921 | 0.049834478 | 0.044616448 | 1.116953057 |
| <b>Psalidoprocne pristoptera</b> | MorphoSource (ID: 000073409) | Invertebrates     | Aerialscreaming  | Non-flesh | Non-aquatic | 0.026158734 | 0.05091491  | 0.063649462 | 0.052841001 | 0.073725934 | 0.080291021 | 0.044838251 | 5.621051844 | 0.658118436 | 0.963549315  | 0.799926799 | 1.790681376 | 0.050301729 | 0.05975173  | 0.841845567 |
| <b>Megalaima asiatica</b>        | MorphoSource (ID: 000072684) | Fruit             | Arborealgleaning | Non-flesh | Non-aquatic | 0.068689796 | 0.064409382 | 0.072495515 | 0.069524339 | 0.075900622 | 0.085532153 | 0.035563188 | 14.44228922 | 0.81284483  | 0.926429259  | 0.888460225 | 2.405075553 | 0.085299334 | 0.081401379 | 1.047885614 |
| <b>Pterocles quadricinctus</b>   | MorphoSource (ID: 000093681) | Seeds             | Groundforaging   | Non-flesh | Non-aquatic | 0.086517589 | 0.044090852 | 0.066387876 | 0.069417747 | 0.072266095 | 0.077965313 | 0.04693374  | 2.713870124 | 0.890367065 | 0.63515245   | 0.664140118 | 1.661178365 | 0.080217128 | 0.087917353 | 0.912415186 |
| <b>Ptilonorhynchus violaceus</b> | MorphoSource (ID: 000092979) | Generalist        | Arborealgleaning | Non-flesh | Non-aquatic | 0.201184989 | 0.059587112 | 0.069099944 | 0.073333359 | 0.08031841  | 0.090371165 | 0.047756875 | 8.685697222 | 0.811468561 | 0.812551239  | 0.862332282 | 1.892317406 | 0.119009546 | 0.128686068 | 0.924805209 |
| <b>Pycnonotus cafer</b>          | MorphoSource (ID: 000092706) | Generalist        | Arborealgleaning | Non-flesh | Non-aquatic | 0.072522961 | 0.044693288 | 0.052525106 | 0.049829221 | 0.050409803 | 0.058228748 | 0.029762739 | 4.998007459 | 0.85574949  | 0.896928887  | 0.850893437 | 1.956431072 | 0.061860703 | 0.058223333 | 1.06247272  |
| <b>Sarothrura pulchra</b>        | MorphoSource (ID: 000072793) | Aquaticanimals    | Groundforaging   | Flesh     | Aquatic     | 0.023169342 | 0.052307095 | 0.08864323  | 0.089431084 | 0.077231881 | 0.083995461 | 0.053559752 | 15.25113229 | 1.064713291 | 0.584887191  | 0.590085617 | 1.568257087 | 0.066507244 | 0.062005427 | 1.072603596 |
| <b>Scissirostrum dubium</b>      | MorphoSource (ID: 000086185) | Generalist        | Arborealgleaning | Non-flesh | Non-aquatic | 0.10131196  | 0.052823744 | 0.059159102 | 0.051039002 | 0.053857208 | 0.060588667 | 0.036306676 | 5.186238624 | 0.842385293 | 1.034968201  | 0.892909834 | 1.668802371 | 0.076579733 | 0.070816214 | 1.081386997 |
| <b>Spheniscus mendiculus</b>     | MorphoSource (ID: 000097861) | Aquaticanimals    | Aquaticdive      | Flesh     | Aquatic     | 1.749297414 | 0.045915279 | 0.064159698 | 0.04292941  | 0.031791744 | 0.032784989 | 0.025849136 | 3.107101832 | 1.309422751 | 1.069552976  | 0.715640499 | 1.268320495 | 0.184013163 | 0.108752111 | 1.692042217 |
| <b>Sula dactylatra</b>           | MorphoSource (ID: 000093058) | Aquaticanimals    | Aquaticplunge    | Flesh     | Aquatic     | 1.213000579 | 0.056102131 | 0.0736192   | 0.162302741 | 0.165713315 | 0.171179687 | 0.07243484  | 7.277775998 | 0.94814253  | 0.3456663483 | 0.762058417 | 2.363223095 | 0.311238121 | 0.436260023 | 0.713423428 |

|                                   |                              |                    |                   |           |             |             |             |             |             |             |             |             |             |             |             |             |             |             |             |             |
|-----------------------------------|------------------------------|--------------------|-------------------|-----------|-------------|-------------|-------------|-------------|-------------|-------------|-------------|-------------|-------------|-------------|-------------|-------------|-------------|-------------|-------------|-------------|
| <b>Surnia ulula</b>               | MorphoSource (ID: 000157600) | Vertebrates        | Aerial sallying   | Flesh     | Non-aquatic | 0.110592079 | 0.073569653 | 0.087045122 | 0.138437019 | 0.148519691 | 0.155812796 | 0.079551293 | 2.558371292 | 0.88848299  | 0.53143049  | 0.845189845 | 1.958645683 | 0.144602346 | 0.185621676 | 0.779016487 |
| <b>Topaza pyra</b>                | MorphoSource (ID: 000107939) | Nectar             | Aerial screening  | Non-flesh | Non-aquatic | 0.024837009 | 0.032136181 | 0.046775626 | 0.023832669 | 0.022674812 | 0.026776628 | 0.029777988 | 5.033049672 | 0.890054899 | 1.348408836 | 0.687028349 | 0.899208787 | 0.030348781 | 0.023402879 | 1.296796903 |
| <b>Tyrannetes stolzmanni</b>      | MorphoSource (ID: 000052922) | Fruit              | Aerial sallying   | Non-flesh | Non-aquatic | 0.011382884 | 0.052406557 | 0.059114344 | 0.051604179 | 0.059111545 | 0.064985688 | 0.033782845 | 11.37106378 | 0.79408529  | 1.015548694 | 0.886528607 | 1.92362985  | 0.037246374 | 0.036048782 | 1.033221428 |
| <b>Tyto alba</b>                  | MorphoSource (ID: 000109995) | Vertebrates        | Aerial sallying   | Flesh     | Non-aquatic | 0.215686582 | 0.054710247 | 0.065339375 | 0.132211818 | 0.139627087 | 0.145858979 | 0.068811636 | 12.19045838 | 0.906435918 | 0.413807537 | 0.837324309 | 2.119684815 | 0.15205913  | 0.213564945 | 0.712004163 |
| <b>Sterna hirundo</b>             | MorphoSource (ID: 000109908) | Aquatic animals    | Aquatic plunge    | Flesh     | Aquatic     | 0.188216169 | 0.039117344 | 0.05588921  | 0.095961178 | 0.106945631 | 0.111132738 | 0.058419903 | 4.318726198 | 0.863482529 | 0.407637179 | 0.699908694 | 1.902309517 | 0.110051705 | 0.159341613 | 0.690665187 |
| <b>Strigops habroptila</b>        | MorphoSource (ID: 000110026) | Terrestrial plants | Ground foraging   | Non-flesh | Non-aquatic | 0.377591713 | 0.055257743 | 0.058033797 | 0.096043783 | 0.085987785 | 0.095395765 | 0.053388004 | 17.011818   | 1.006792944 | 0.575339092 | 0.952164878 | 1.786838969 | 0.15179586  | 0.170240499 | 0.891655399 |
| <b>Tauraco persa</b>              | MorphoSource (ID: 000086199) | Fruit              | Arboreal gleaning | Flesh     | Aquatic     | 0.142114031 | 0.056405176 | 0.081043472 | 0.084744116 | 0.071649547 | 0.077610705 | 0.038176633 | 9.34870604  | 1.091912725 | 0.665594011 | 0.695986672 | 2.032953563 | 0.116707861 | 0.098452002 | 1.185429028 |
| <b>Vultur gryphus</b>             | MorphoSource (ID: 000110010) | Carriion           | Ground foraging   | Flesh     | Non-aquatic | 12.68856847 | 0.045717157 | 0.049635062 | 0.113869297 | 0.127620602 | 0.133410045 | 0.05778405  | 2.042571955 | 0.853528662 | 0.402014921 | 0.922274592 | 2.308769369 | 0.484013015 | 0.737334408 | 0.656436225 |
| <b>Zavattariornis stresemanni</b> | MorphoSource (ID: 000086177) | Invertebrates      | Ground foraging   | Non-flesh | Non-aquatic | 0.105550609 | 0.061127054 | 0.066631674 | 0.074989674 | 0.075170826 | 0.084264295 | 0.046123172 | 10.50825297 | 0.889934155 | 0.815139616 | 0.917387346 | 1.826940604 | 0.096538264 | 0.097876188 | 0.986330444 |
| <b>Acanthisitta chloris</b>       | MorphoSource (ID: 000109874) | Invertebrates      | Bark gleaning     | Non-flesh | Non-aquatic | 0.008528506 | 0.045513749 | 0.050329696 | 0.050656796 | 0.059966887 | 0.065238076 | 0.035575953 | 7.479129404 | 0.776491264 | 0.898472716 | 0.904312036 | 1.833768907 | 0.0304107   | 0.0333751   | 0.911179292 |
| <b>Anser fabalis</b>              | MorphoSource (ID: 000108615) | Terrestrial plants | Ground foraging   | Non-flesh | Aquatic     | 3.090205011 | 0.048350975 | 0.062983201 | 0.107258115 | 0.096394897 | 0.101485742 | 0.059555948 | 2.235330852 | 1.056878654 | 0.450790836 | 0.767680498 | 1.704040426 | 0.317198152 | 0.37356491  | 0.849111208 |
| <b>Anseranas semipalmata</b>      | MorphoSource (ID: 000083954) | Terrestrial plants | Ground foraging   | Non-flesh | Aquatic     | 2.921563927 | 0.046938044 | 0.05988575  | 0.118157131 | 0.108954124 | 0.114596984 | 0.05286555  | 2.444668191 | 1.031066673 | 0.397251044 | 0.783793197 | 2.167706279 | 0.32047841  | 0.39374703  | 0.813919562 |
| <b>Caprimulgus carolinensis</b>   | MorphoSource (ID: 000065224) | Invertebrates      | Aerial screening  | Non-flesh | Non-aquatic | 0.192289036 | 0.042513376 | 0.053993086 | 0.07705227  | 0.088806443 | 0.092170573 | 0.048440542 | 12.16269918 | 0.835974736 | 0.551747217 | 0.787385551 | 1.902756831 | 0.10072829  | 0.13314708  | 0.756518956 |
| <b>Aramus guaranauna</b>          | MorphoSource (ID: 000125551) | Aquatic animals    | Ground foraging   | Flesh     | Non-aquatic | 0.889805226 | 0.047001823 | 0.053211709 | 0.107637817 | 0.108693726 | 0.116344377 | 0.057209156 | 5.299755679 | 0.925165616 | 0.436666442 | 0.883298496 | 2.033667072 | 0.19999548  | 0.271579551 | 0.736415828 |
| <b>Artamus leucorhynchus</b>      | MorphoSource (ID: 000368995) | Invertebrates      | Aerial screening  | Non-flesh | Non-aquatic | 0.031113196 | 0.067778849 | 0.074341218 | 0.074268869 | 0.089643405 | 0.098964248 | 0.050185041 | 4.654915554 | 0.750461607 | 0.912614534 | 0.911726374 | 1.971986996 | 0.068850449 | 0.075978858 | 0.906179045 |
| <b>Barnardius zonarius</b>        | MorphoSource (ID: 000108655) | Fruit              | Arboreal gleaning | Non-flesh | Non-aquatic | 0.231060657 | 0.044104948 | 0.050246242 | 0.056414769 | 0.059927581 | 0.065596125 | 0.043612023 | 8.537291574 | 0.860032033 | 0.781797904 | 0.877776057 | 1.50408353  | 0.092967869 | 0.104295349 | 0.891390363 |
| <b>Bombycilla cedrorum</b>        | MorphoSource (ID: 000114489) | Fruit              | Arboreal gleaning | Non-flesh | Non-aquatic | 0.040537095 | 0.059410057 | 0.075162226 | 0.060566287 | 0.064728886 | 0.073468153 | 0.041708991 | 3.212341684 | 0.824388319 | 0.980909668 | 0.790424387 | 1.761446441 | 0.067753929 | 0.062465049 | 1.084669428 |
| <b>Bucorvus abyssinicus</b>       | MorphoSource (ID: 000108667) | Invertebrates      | Ground foraging   | Non-flesh | Non-aquatic | 1.661637699 | 0.066859623 | 0.082570775 | 0.123492475 | 0.15048768  | 0.16327191  | 0.062543918 | 4.619945073 | 0.756360817 | 0.541406451 | 0.809725024 | 2.610516184 | 0.322713345 | 0.444954146 | 0.725273262 |
| <b>Buphagus erythrorhynchus</b>   | MorphoSource (ID: 000072669) | Invertebrates      | Bark gleaning     | Non-flesh | Non-aquatic | 0.102845546 | 0.049178673 | 0.051824218 | 0.056586297 | 0.057906014 | 0.066375784 | 0.039722034 | 14.76190228 | 0.852514171 | 0.869091568 | 0.94895157  | 1.671006686 | 0.074395665 | 0.077423929 | 0.960887234 |

|                                   |                              |                 |                   |            |             |             |             |             |             |             |             |             |             |             |             |             |             |             |             |             |
|-----------------------------------|------------------------------|-----------------|-------------------|------------|-------------|-------------|-------------|-------------|-------------|-------------|-------------|-------------|-------------|-------------|-------------|-------------|-------------|-------------|-------------|-------------|
| <b>Capito niger</b>               | MorphoSource (ID: 000108203) | Fruit           | Arboreal gleaning | Non-fleshy | Non-aquatic | 0.057681765 | 0.067817542 | 0.069506333 | 0.062957606 | 0.067951349 | 0.076451105 | 0.032948181 | 2.553718667 | 0.823501589 | 1.077193787 | 0.975703062 | 2.320343707 | 0.078123828 | 0.069179189 | 1.129296673 |
| <b>Cariama cristata</b>           | MorphoSource (ID: 000375527) | Invertebrates   | Ground foraging   | Non-fleshy | Non-aquatic | 1.069593316 | 0.056414566 | 0.082414964 | 0.108666048 | 0.098867062 | 0.106584603 | 0.053228843 | 4.838660005 | 1.019528572 | 0.519155399 | 0.684518481 | 2.002384378 | 0.253051903 | 0.264487937 | 0.956761605 |
| <b>Hirundo semirufa</b>           | MorphoSource (ID: 000097699) | Invertebrates   | Aerial screening  | Non-fleshy | Non-aquatic | 0.063283096 | 0.040978147 | 0.04987721  | 0.042001949 | 0.056251561 | 0.062205346 | 0.039310073 | 1.847009824 | 0.675214458 | 0.975624889 | 0.821580579 | 1.582427655 | 0.053433102 | 0.063451378 | 0.842110978 |
| <b>Chlorospingus flavicularis</b> | MorphoSource (ID: 000097890) | Fruit           | Arboreal gleaning | Non-fleshy | Non-aquatic | 0.011666513 | 0.065088833 | 0.070430118 | 0.067068753 | 0.068637077 | 0.077561847 | 0.042702212 | 7.729533238 | 0.864713206 | 0.970479254 | 0.924161919 | 1.81634259  | 0.046634104 | 0.043483563 | 1.072453607 |
| <b>Chunga burmeisteri</b>         | MorphoSource (ID: 000125536) | Invertebrates   | Ground foraging   | Non-fleshy | Non-aquatic | 0.68840681  | 0.058676787 | 0.083118946 | 0.099259608 | 0.089870611 | 0.094240428 | 0.050145954 | 6.104116692 | 1.053259303 | 0.591144661 | 0.705937578 | 1.879322681 | 0.213110899 | 0.207100652 | 1.029020898 |
| <b>Cinclus mexicanus</b>          | MorphoSource (ID: 000073645) | Aquatic animals | Ground foraging   | Fleshy     | Aquatic     | 0.078803963 | 0.050723658 | 0.050624291 | 0.051864961 | 0.052173931 | 0.06099959  | 0.036730675 | 16.63118643 | 0.85025097  | 0.977994729 | 1.00196284  | 1.660726083 | 0.066245475 | 0.064814869 | 1.022072188 |
| <b>Colinus virginianus</b>        | MorphoSource (ID: 000109722) | Seeds           | Ground foraging   | Non-fleshy | Non-aquatic | 0.167302758 | 0.053940393 | 0.078715743 | 0.063926245 | 0.052213159 | 0.058273224 | 0.034109348 | 11.30564088 | 1.097008895 | 0.843791039 | 0.685255462 | 1.708423843 | 0.1089641   | 0.080178078 | 1.359079847 |
| <b>Columba livia</b>              | MorphoSource (ID: 000056052) | Seeds           | Ground foraging   | Non-fleshy | Non-aquatic | 0.220229098 | 0.060066488 | 0.074259014 | 0.080226431 | 0.085868182 | 0.093306048 | 0.057191592 | 12.42714257 | 0.859820259 | 0.748711959 | 0.808878073 | 1.631464432 | 0.130221017 | 0.143460827 | 0.907711322 |
| <b>Coracias benghalensis</b>      | MorphoSource (ID: 000108722) | Invertebrates   | Aerial sallying   | Non-fleshy | Non-aquatic | 0.209956432 | 0.048417046 | 0.058760127 | 0.12729758  | 0.144081166 | 0.152591063 | 0.066843739 | 17.01640796 | 0.834240081 | 0.380345374 | 0.823977896 | 2.282802612 | 0.140087285 | 0.217183148 | 0.645019129 |
| <b>Dendropicos gabonensis</b>     | MorphoSource (ID: 000045387) | Invertebrates   | Bark gleaning     | Non-fleshy | Non-aquatic | 0.150917932 | 0.043221504 | 0.035580927 | 0.05194179  | 0.058136733 | 0.063743443 | 0.029539067 | 10.01751071 | 0.814856995 | 0.832114262 | 1.214396718 | 2.157936868 | 0.070055171 | 0.081127025 | 0.863524467 |
| <b>Dendroplex picus</b>           | MorphoSource (ID: 000095985) | Invertebrates   | Bark gleaning     | Non-fleshy | Non-aquatic | 0.044328145 | 0.056012394 | 0.056468019 | 0.067355498 | 0.068945059 | 0.077973982 | 0.043833824 | 2.989626568 | 0.86382016  | 0.831593494 | 0.991931275 | 1.77885419  | 0.06431032  | 0.068214284 | 0.942769113 |
| <b>Derophtus accipitrinus</b>     | MorphoSource (ID: 000110101) | Fruit           | Arboreal gleaning | Non-fleshy | Non-aquatic | 0.434775163 | 0.045595203 | 0.048675716 | 0.062981159 | 0.068888433 | 0.075517325 | 0.044216676 | 6.043397884 | 0.833996167 | 0.723949883 | 0.936713559 | 1.707892378 | 0.119460342 | 0.143291591 | 0.833687038 |
| <b>Dicaeum australe</b>           | MorphoSource (ID: 000114367) | Fruit           | Arboreal gleaning | Non-fleshy | Non-aquatic | 0.016982032 | 0.057848005 | 0.06287632  | 0.058832791 | 0.060880721 | 0.067055741 | 0.036613145 | 5.279586094 | 0.877371413 | 0.983261289 | 0.920028484 | 1.831466289 | 0.0467842   | 0.042873944 | 1.091203552 |
| <b>Dryolimnas cuvieri</b>         | MorphoSource (ID: 000170696) | Aquatic animals | Ground foraging   | Fleshy     | Non-aquatic | 0.132070684 | 0.044071102 | 0.069008751 | 0.080306735 | 0.060918355 | 0.066914132 | 0.044372345 | 14.19239488 | 1.20014611  | 0.548784633 | 0.638630633 | 1.508014339 | 0.099149944 | 0.088289987 | 1.123003269 |
| <b>Enicurus schistaceus</b>       | MorphoSource (ID: 000091719) | Aquatic animals | Ground foraging   | Fleshy     | Non-aquatic | 0.044658286 | 0.054309992 | 0.060382384 | 0.062170833 | 0.068242458 | 0.077131492 | 0.041454274 | 2.919433585 | 0.806036953 | 0.873560633 | 0.899434372 | 1.860640288 | 0.063402324 | 0.066974605 | 0.946662156 |
| <b>Eudromia elegans</b>           | MorphoSource (ID: 000092845) | Generalist      | Ground foraging   | Non-fleshy | Non-aquatic | 0.512321839 | 0.045691456 | 0.066638042 | 0.081623216 | 0.080284889 | 0.087220492 | 0.048964173 | 6.424468273 | 0.935826145 | 0.559785052 | 0.685666252 | 1.781312475 | 0.155541044 | 0.1735985   | 0.895981498 |
| <b>Eurystomus gularis</b>         | MorphoSource (ID: 000042765) | Invertebrates   | Aerial screening  | Non-fleshy | Non-aquatic | 0.195312655 | 0.047546178 | 0.056397702 | 0.077962468 | 0.088077775 | 0.09240828  | 0.045523118 | 12.18374713 | 0.84367405  | 0.609859834 | 0.843051693 | 2.029919831 | 0.106117957 | 0.131846041 | 0.804862673 |
| <b>Gavia stellata</b>             | MorphoSource (ID: 000092076) | Aquatic animals | Aquatic dive      | Fleshy     | Aquatic     | 1.343637692 | 0.046582166 | 0.058168466 | 0.123479278 | 0.098930906 | 0.101251664 | 0.066264494 | 4.058566184 | 1.219528389 | 0.377246826 | 0.800814759 | 1.5279927   | 0.251597127 | 0.293727127 | 0.856567555 |
| <b>Glaeola pratincola</b>         | MorphoSource (ID: 000093274) | Invertebrates   | Aerial screening  | Non-fleshy | Non-aquatic | 0.134734834 | 0.035332224 | 0.049949692 | 0.077365094 | 0.087606185 | 0.091281372 | 0.051052845 | 15.03781865 | 0.847545262 | 0.456694639 | 0.707356187 | 1.787978157 | 0.08394106  | 0.11867074  | 0.707344203 |

|                                |                              |                 |                   |           |             |             |             |             |             |             |             |             |             |             |             |             |             |             |             |             |
|--------------------------------|------------------------------|-----------------|-------------------|-----------|-------------|-------------|-------------|-------------|-------------|-------------|-------------|-------------|-------------|-------------|-------------|-------------|-------------|-------------|-------------|-------------|
| <b>Haematopus ostralegus</b>   | MorphoSource (ID: 000093286) | Aquatic animals | Ground foraging   | Flesh     | Aquatic     | 0.442506865 | 0.04593491  | 0.069129493 | 0.098963692 | 0.097251495 | 0.102477131 | 0.056590958 | 8.121805749 | 0.965714894 | 0.46415922  | 0.664476302 | 1.810839312 | 0.16354015  | 0.19585533  | 0.835004848 |
| <b>Hemiprocne comata</b>       | MorphoSource (ID: 000092876) | Invertebrates   | Aerial sallying   | Non-flesh | Non-aquatic | 0.03668162  | 0.032439177 | 0.044755246 | 0.038784281 | 0.043773287 | 0.046551835 | 0.036099718 | 2.22002736  | 0.833141823 | 0.83640012  | 0.724812849 | 1.289534583 | 0.03896245  | 0.042471776 | 0.917372751 |
| <b>Hymenops perspicillatus</b> | MorphoSource (ID: 000092905) | Invertebrates   | Ground foraging   | Non-flesh | Non-aquatic | 0.051763068 | 0.044915781 | 0.052373548 | 0.05377668  | 0.065641823 | 0.072396126 | 0.034886381 | 2.355801244 | 0.742811575 | 0.835227838 | 0.857604308 | 2.075197376 | 0.056858233 | 0.065085269 | 0.873596036 |
| <b>Irena cyanogastra</b>       | MorphoSource (ID: 000057165) | Fruit           | Arboreal gleaning | Non-flesh | Non-aquatic | 0.086651503 | 0.062996942 | 0.071258597 | 0.069937432 | 0.069579948 | 0.079399659 | 0.043218643 | 2.040863619 | 0.88082786  | 0.900761447 | 0.884060934 | 1.83716226  | 0.091097593 | 0.08574633  | 1.06240807  |
| <b>Ixobrychus minutus</b>      | MorphoSource (ID: 000092113) | Aquatic animals | Ground foraging   | Flesh     | Aquatic     | 0.171859381 | 0.055934103 | 0.062436449 | 0.101897011 | 0.100420933 | 0.105581679 | 0.055082331 | 15.66380133 | 0.965101259 | 0.54892781  | 0.895856566 | 1.91679759  | 0.123184969 | 0.14601215  | 0.843662455 |
| <b>Jacana jacana</b>           | MorphoSource (ID: 000092126) | Aquatic animals | Ground foraging   | Flesh     | Aquatic     | 0.157764145 | 0.039932246 | 0.064370988 | 0.080397609 | 0.084745373 | 0.091167993 | 0.046818934 | 14.04076573 | 0.88186224  | 0.496684504 | 0.620345406 | 1.947246226 | 0.100418012 | 0.121094925 | 0.829250375 |
| <b>Phalacrocorax atriceps</b>  | MorphoSource (ID: 000092511) | Aquatic animals | Aquatic dive      | Flesh     | Aquatic     | 1.434534922 | 0.066617913 | 0.08048157  | 0.125809066 | 0.132927737 | 0.137801742 | 0.057050105 | 4.716855823 | 0.912971518 | 0.529516001 | 0.827741225 | 2.415451156 | 0.307419783 | 0.369229652 | 0.832597765 |
| <b>Megalaima chrysopogon</b>   | MorphoSource (ID: 000092169) | Fruit           | Arboreal gleaning | Non-flesh | Non-aquatic | 0.128951527 | 0.052563066 | 0.059013362 | 0.056976063 | 0.061881165 | 0.069766097 | 0.028560634 | 12.96861882 | 0.81667264  | 0.922546475 | 0.890697702 | 2.442736321 | 0.085738507 | 0.081493817 | 1.052086037 |
| <b>Menura novaehollandiae</b>  | MorphoSource (ID: 000093333) | Invertebrates   | Ground foraging   | Non-flesh | Non-aquatic | 0.56181882  | 0.057312815 | 0.074649644 | 0.080117698 | 0.075810319 | 0.084703652 | 0.049811904 | 6.215208668 | 0.945858848 | 0.715357729 | 0.76775738  | 1.70047007  | 0.17533427  | 0.173883942 | 1.008340782 |
| <b>Mniotilta varia</b>         | MorphoSource (ID: 000101435) | Invertebrates   | Bark gleaning     | Non-flesh | Non-aquatic | 0.012190816 | 0.056055933 | 0.058759358 | 0.059490939 | 0.065077756 | 0.072520142 | 0.039832976 | 6.738703956 | 0.820336772 | 0.942260005 | 0.953991571 | 1.820605669 | 0.040710246 | 0.041440025 | 0.982389514 |
| <b>Momotus momota</b>          | MorphoSource (ID: 000092205) | Invertebrates   | Aerial sallying   | Non-flesh | Non-aquatic | 0.08001906  | 0.06339276  | 0.073517961 | 0.086935439 | 0.101708707 | 0.107021735 | 0.046155551 | 2.599878079 | 0.812315731 | 0.729193531 | 0.862275812 | 2.318718617 | 0.097275503 | 0.1107643   | 0.878220717 |
| <b>Monias benschi</b>          | MorphoSource (ID: 000092221) | Invertebrates   | Ground foraging   | Non-flesh | Non-aquatic | 0.060347584 | 0.067755833 | 0.073651902 | 0.077073699 | 0.071058763 | 0.076335915 | 0.04222062  | 2.6774477   | 1.009664953 | 0.879104471 | 0.919946823 | 1.808024522 | 0.086503225 | 0.075074273 | 1.152235267 |
| <b>Myrmothera campanisona</b>  | MorphoSource (ID: 000093373) | Invertebrates   | Ground foraging   | Non-flesh | Non-aquatic | 0.036956478 | 0.063113633 | 0.069495798 | 0.072643261 | 0.067045926 | 0.07593849  | 0.037817971 | 3.518005693 | 0.956606594 | 0.868816077 | 0.908164733 | 2.008000101 | 0.069123664 | 0.06088945  | 1.135232195 |
| <b>Numida meleagris</b>        | MorphoSource (ID: 000093395) | Generalist      | Ground foraging   | Non-flesh | Non-aquatic | 1.248953141 | 0.049844217 | 0.069424902 | 0.073324373 | 0.061051043 | 0.069596564 | 0.03846561  | 3.11652525  | 1.053563126 | 0.679776926 | 0.717958763 | 1.809319115 | 0.207253482 | 0.181985916 | 1.138843525 |
| <b>Parus atricapillus</b>      | MorphoSource (ID: 000093658) | Invertebrates   | Arboreal gleaning | Non-flesh | Non-aquatic | 0.001904536 | 0.050342191 | 0.05094694  | 0.051672547 | 0.057046012 | 0.06414793  | 0.0358147   | 2.059971563 | 0.805521654 | 0.974254108 | 0.98812983  | 1.791106146 | 0.019360344 | 0.019872568 | 0.974224569 |
| <b>Pedionomus torquatus</b>    | MorphoSource (ID: 000092430) | Invertebrates   | Ground foraging   | Non-flesh | Non-aquatic | 0.062170217 | 0.045136561 | 0.069610058 | 0.087921146 | 0.093744057 | 0.09849089  | 0.048163199 | 2.849496247 | 0.892683029 | 0.513375481 | 0.648420095 | 2.044940764 | 0.081033923 | 0.096119898 | 0.843050447 |
| <b>Pelagodroma marina</b>      | MorphoSource (ID: 000092446) | Aquatic animals | Aerial screening  | Flesh     | Aquatic     | 0.02671305  | 0.051671237 | 0.065624353 | 0.082976113 | 0.071775057 | 0.076119762 | 0.055481502 | 4.571915225 | 1.0900732   | 0.622724244 | 0.787378998 | 1.371984521 | 0.060595216 | 0.061534565 | 0.984734612 |
| <b>Phalacrocorax harrisi</b>   | MorphoSource (ID: 000110022) | Aquatic animals | Aquatic dive      | Flesh     | Aquatic     | 0.925642155 | 0.05947543  | 0.062262495 | 0.093390677 | 0.071824737 | 0.075877695 | 0.039715078 | 4.239344847 | 1.230805406 | 0.636845475 | 0.955236856 | 1.910551312 | 0.209712533 | 0.182699094 | 1.147857542 |
| <b>Phoebastria irrorata</b>    | MorphoSource (ID: 000092014) | Aquatic animals | Aquatic surface   | Flesh     | Aquatic     | 4.190631371 | 0.048407674 | 0.070443925 | 0.188909872 | 0.181858795 | 0.185570226 | 0.07024141  | 2.854175908 | 1.017996669 | 0.256247454 | 0.687180245 | 2.641892083 | 0.493817493 | 0.70226242  | 0.703180861 |

|                                  |                                     |               |                  |                        |                          |                 |                 |                 |                 |                 |                |             |                 |                 |             |             |                 |                 |                 |                |
|----------------------------------|-------------------------------------|---------------|------------------|------------------------|--------------------------|-----------------|-----------------|-----------------|-----------------|-----------------|----------------|-------------|-----------------|-----------------|-------------|-------------|-----------------|-----------------|-----------------|----------------|
| <b>Phoeniculus<br/>purpureus</b> | MorphoSource (ID:<br>00009363<br>3) | Invertebrates | Bark<br>gleaning | Non-<br>-<br>fles<br>h | Non-<br>-<br>aqua<br>tic | 0.068296<br>757 | 0.058480<br>036 | 0.065971<br>053 | 0.082714<br>061 | 0.089082<br>316 | 0.100024<br>31 | 0.047282448 | 2.678542<br>994 | 0.826939<br>586 | 0.707014443 | 0.886449934 | 2.115463<br>843 | 0.085441<br>473 | 0.097494<br>345 | 0.8763736<br>3 |
|----------------------------------|-------------------------------------|---------------|------------------|------------------------|--------------------------|-----------------|-----------------|-----------------|-----------------|-----------------|----------------|-------------|-----------------|-----------------|-------------|-------------|-----------------|-----------------|-----------------|----------------|



**Table S2.** Phylogenetic signal ( $K_{\text{mult}}$ ) of studied vertebral regions.

| Group | $K_{\text{mult}}$ | Effect size | P     |
|-------|-------------------|-------------|-------|
| All   | 0.8459            | 7.7483      | 0.001 |
| C2    | 0.771             | 6.2629      | 0.001 |
| C25%  | 1.1564            | 6.799       | 0.001 |
| C50%  | 0.7754            | 6.1272      | 0.001 |
| C75%  | 0.8707            | 7.8927      | 0.001 |
| Last  | 0.6937            | 7.7007      | 0.001 |

**Table S3.** Phylogenetic MANOVA results.

| Vertebrae | Dependent variable | SS          | MS          | $R^2$       | F           | Z          | P     |
|-----------|--------------------|-------------|-------------|-------------|-------------|------------|-------|
| All       | Body mass          | 0.003471666 | 0.003471666 | 0.015962166 | 1.78431982  | 1.90451059 | 0.03  |
| All       | Diet               | 0.02018124  | 0.002522655 | 0.092790119 | 1.316864821 | 1.1102743  | 0.13  |
| All       | Foraging           | 0.022433283 | 0.00280416  | 0.103144652 | 1.480715256 | 2.14487298 | 0.014 |
| C2        | Body mass          | 0.000592618 | 0.000592618 | 0.012319566 | 1.372055411 | 1.04025489 | 0.157 |
| C2        | Diet               | 0.004076384 | 0.000509548 | 0.084741358 | 1.192061925 | 0.33388603 | 0.376 |
| C2        | Foraging           | 0.005225899 | 0.000653237 | 0.108637897 | 1.569185994 | 1.98975449 | 0.021 |
| C25%      | Body mass          | 0.000712957 | 0.000712957 | 0.016304204 | 1.823188043 | 1.52835232 | 0.074 |
| C25%      | Diet               | 0.003690035 | 0.000461254 | 0.084385316 | 1.186591871 | 0.24319304 | 0.391 |
| C25%      | Foraging           | 0.004399122 | 0.00054989  | 0.10060104  | 1.440115502 | 1.45134637 | 0.08  |
| C50%      | Body mass          | 0.000600605 | 0.000600605 | 0.018316015 | 2.052352608 | 1.92918207 | 0.029 |
| C50%      | Diet               | 0.003194898 | 0.000399362 | 0.097431446 | 1.389844415 | 0.86575954 | 0.195 |
| C50%      | Foraging           | 0.003137218 | 0.000392152 | 0.095672446 | 1.362097987 | 1.07204918 | 0.143 |
| C75%      | Body mass          | 0.000498443 | 0.000498443 | 0.013067709 | 1.456480881 | 1.11468044 | 0.132 |
| C75%      | Diet               | 0.004160787 | 0.000520098 | 0.109083512 | 1.576410622 | 1.91884657 | 0.024 |
| C75%      | Foraging           | 0.003811614 | 0.000476452 | 0.099929232 | 1.429430783 | 1.55043703 | 0.064 |
| Last      | Body mass          | 0.001067043 | 0.001067043 | 0.01949762  | 2.187387089 | 2.44433608 | 0.005 |
| Last      | Diet               | 0.005059136 | 0.000632392 | 0.092443469 | 1.311444105 | 1.24828378 | 0.104 |
| Last      | Foraging           | 0.005859429 | 0.000732429 | 0.107066881 | 1.543773053 | 2.47167332 | 0.007 |

**Table S4.** Two-block partial least-squares (2BPLS) results for whole neck integration.

| <b>Vertebrae</b> | <b>Dependent variable</b>        | <b>Z</b> | <b>P</b> | <b>R (PLS)</b> |
|------------------|----------------------------------|----------|----------|----------------|
| <b>All</b>       | Forelimb                         | 2.7424   | 0.001    | 0.710198497    |
| <b>All</b>       | Forelimb (body mass corrected)   | 1.7008   | 0.033    | 0.568195804    |
| <b>All</b>       | Head mass                        | 1.7901   | 0.024    | 0.579108491    |
| <b>All</b>       | Head mass (% of total body mass) | 1.5916   | 0.049    | 0.556424289    |
| <b>C2</b>        | Forelimb                         | 2.8782   | 0.001    | 0.592721833    |
| <b>C2</b>        | Forelimb (body mass corrected)   | 2.0902   | 0.003    | 0.496019439    |
| <b>C2</b>        | Head mass                        | 2.3811   | 0.001    | 0.51617467     |
| <b>C2</b>        | Head mass (% of total body mass) | 1.6541   | 0.048    | 0.433369586    |
| <b>C25%</b>      | Forelimb                         | 1.9737   | 0.013    | 0.452578214    |
| <b>C25%</b>      | Forelimb (body mass corrected)   | 1.062    | 0.179    | 0.349481923    |
| <b>C25%</b>      | Head mass                        | 1.7762   | 0.027    | 0.423513472    |
| <b>C25%</b>      | Head mass (% of total body mass) | 2.1752   | 0.006    | 0.490760231    |
| <b>C50%</b>      | Forelimb                         | 4.7814   | 0.001    | 0.689243869    |
| <b>C50%</b>      | Forelimb (body mass corrected)   | 3.6      | 0.001    | 0.552289802    |
| <b>C50%</b>      | Head mass                        | 2.8379   | 0.002    | 0.476          |
| <b>C50%</b>      | Head mass (% of total body mass) | 2.5605   | 0.003    | 0.438719216    |
| <b>C75%</b>      | Forelimb                         | 4.6391   | 0.001    | 0.635993986    |
| <b>C75%</b>      | Forelimb (body mass corrected)   | 3.3917   | 0.001    | 0.522682979    |
| <b>C75%</b>      | Head mass                        | 2.2838   | 0.01     | 0.429165792    |
| <b>C75%</b>      | Head mass (% of total body mass) | 2.4875   | 0.007    | 0.441980193    |
| <b>Last</b>      | Forelimb                         | 6.2587   | 0.001    | 0.766514241    |
| <b>Last</b>      | Forelimb (body mass corrected)   | 4.6609   | 0.001    | 0.582656011    |
| <b>Last</b>      | Head mass                        | 3.8251   | 0.001    | 0.541632464    |
| <b>Last</b>      | Head mass (% of total body mass) | 2.8623   | 0.002    | 0.495249459    |

**Table S5.** 2BPLS results for all groupings (diet, foraging, flesh feeding, aquatic dwelling).

| <b>Vertebrae</b> | <b>Dependent variable</b> | <b>Diet</b> | <b>Z</b>    | <b>P</b> | <b>R (PLS)</b> |
|------------------|---------------------------|-------------|-------------|----------|----------------|
| <b>All</b>       | Forelimb                  | Aquatic     | 2.380658713 | 0.008    | 0.777730929    |
| <b>All</b>       | Forelimb                  | Carrion     | -0.35367384 | 0.5915   | 0.972854989    |

|      |           |                    |             |        |             |
|------|-----------|--------------------|-------------|--------|-------------|
| All  | Forelimb  | Fruit              | -0.19548476 | 0.571  | 0.616913467 |
| All  | Forelimb  | Generalist         | 0.809048062 | 0.22   | 0.774959608 |
| All  | Forelimb  | Invertebrates      | 1.118030767 | 0.151  | 0.647960306 |
| All  | Forelimb  | Nectar             | 1.571149267 | 0.083  | 0.937362148 |
| All  | Forelimb  | Seeds              | 1.460411595 | 0.066  | 0.946137864 |
| All  | Forelimb  | Terrestrial plants | 0.815573732 | 0.2905 | 0.984563374 |
| All  | Forelimb  | Vertebrates        | -0.83891343 | 0.7695 | 0.782556005 |
| All  | Head mass | Aquatic            | -0.38528702 | 0.653  | 0.555964399 |
| All  | Head mass | Carrion            | -0.52951102 | 0.7535 | 0.968277497 |
| All  | Head mass | Fruit              | 2.063353083 | 0.019  | 0.790015108 |
| All  | Head mass | Generalist         | 1.762485485 | 0.044  | 0.847754698 |
| All  | Head mass | Invertebrates      | 0.738092283 | 0.241  | 0.617827559 |
| All  | Head mass | Nectar             | 1.059115723 | 0.165  | 0.907470322 |
| All  | Head mass | Seeds              | -0.89991425 | 0.788  | 0.739353843 |
| All  | Head mass | Terrestrial plants | 0.469618768 | 0.3085 | 0.967260961 |
| All  | Head mass | Vertebrates        | 0.759231017 | 0.2275 | 0.822674784 |
| C2   | Forelimb  | Aquatic            | 1.699288697 | 0.044  | 0.645571629 |
| C2   | Forelimb  | Carrion            | -0.72496445 | 0.5915 | 0.995399811 |
| C2   | Forelimb  | Fruit              | 0.531719246 | 0.298  | 0.682220214 |
| C2   | Forelimb  | Generalist         | 0.687985707 | 0.256  | 0.698212461 |
| C2   | Forelimb  | Invertebrates      | 1.321215738 | 0.113  | 0.639986032 |
| C2   | Forelimb  | Nectar             | 0.740830636 | 0.23   | 0.903365388 |
| C2   | Forelimb  | Seeds              | 1.011811388 | 0.174  | 0.901533691 |
| C2   | Forelimb  | Terrestrial plants | 1.192682731 | 0.1255 | 0.93477309  |
| C2   | Forelimb  | Vertebrates        | -0.32626427 | 0.6415 | 0.863893189 |
| C2   | Head mass | Aquatic            | -1.06852219 | 0.848  | 0.360233211 |
| C2   | Head mass | Carrion            | -0.95134113 | 0.7505 | 0.995018541 |
| C2   | Head mass | Fruit              | 1.208933322 | 0.121  | 0.73560746  |
| C2   | Head mass | Generalist         | 2.518981293 | 0.008  | 0.872726813 |
| C2   | Head mass | Invertebrates      | 0.360969991 | 0.364  | 0.534144834 |
| C2   | Head mass | Nectar             | -0.25336864 | 0.592  | 0.81827115  |
| C2   | Head mass | Seeds              | 0.734935354 | 0.239  | 0.883984123 |
| C2   | Head mass | Terrestrial plants | 1.545861531 | 0.0825 | 0.94498344  |
| C2   | Head mass | Vertebrates        | 0.201122688 | 0.4605 | 0.943942584 |
| C25% | Forelimb  | Aquatic            | -0.00532348 | 0.487  | 0.4039273   |

|             |           |                    |             |        |             |
|-------------|-----------|--------------------|-------------|--------|-------------|
| <b>C25%</b> | Forelimb  | Carrion            | -0.93050285 | 0.7505 | 0.964730573 |
| <b>C25%</b> | Forelimb  | Fruit              | 2.024529441 | 0.016  | 0.809904113 |
| <b>C25%</b> | Forelimb  | Generalist         | 0.253712155 | 0.4    | 0.590461702 |
| <b>C25%</b> | Forelimb  | Invertebrates      | 0.443325486 | 0.327  | 0.563242553 |
| <b>C25%</b> | Forelimb  | Nectar             | 1.555122576 | 0.061  | 0.953411486 |
| <b>C25%</b> | Forelimb  | Seeds              | 2.064581631 | 0.012  | 0.947934898 |
| <b>C25%</b> | Forelimb  | Terrestrial plants | 1.227859301 | 0.1485 | 0.908714683 |
| <b>C25%</b> | Forelimb  | Vertebrates        | -0.00407704 | 0.4885 | 0.870433954 |
| <b>C25%</b> | Head mass | Aquatic            | -0.35293394 | 0.632  | 0.375076411 |
| <b>C25%</b> | Head mass | Carrion            | -0.88553993 | 0.5885 | 0.96614617  |
| <b>C25%</b> | Head mass | Fruit              | -0.06306305 | 0.523  | 0.614893328 |
| <b>C25%</b> | Head mass | Generalist         | 2.242264335 | 0.012  | 0.80300922  |
| <b>C25%</b> | Head mass | Invertebrates      | 0.767209327 | 0.25   | 0.597678793 |
| <b>C25%</b> | Head mass | Nectar             | -0.20934651 | 0.556  | 0.847627975 |
| <b>C25%</b> | Head mass | Seeds              | 1.061987533 | 0.157  | 0.866697756 |
| <b>C25%</b> | Head mass | Terrestrial plants | 1.472713711 | 0.0845 | 0.943709608 |
| <b>C25%</b> | Head mass | Vertebrates        | -0.72638175 | 0.7335 | 0.829056272 |
| <b>C50%</b> | Forelimb  | Aquatic            | 1.383194619 | 0.083  | 0.565020686 |
| <b>C50%</b> | Forelimb  | Carrion            | 1.026911634 | 0.2505 | 0.998206162 |
| <b>C50%</b> | Forelimb  | Fruit              | 0.228179368 | 0.416  | 0.668099347 |
| <b>C50%</b> | Forelimb  | Generalist         | 0.957306361 | 0.179  | 0.730587374 |
| <b>C50%</b> | Forelimb  | Invertebrates      | 2.479359284 | 0.012  | 0.738135801 |
| <b>C50%</b> | Forelimb  | Nectar             | 1.613752768 | 0.048  | 0.978041225 |
| <b>C50%</b> | Forelimb  | Seeds              | 1.057788853 | 0.159  | 0.860281957 |
| <b>C50%</b> | Forelimb  | Terrestrial plants | 1.675764037 | 0.0095 | 0.993886412 |
| <b>C50%</b> | Forelimb  | Vertebrates        | 1.391634272 | 0.0255 | 0.994651026 |
| <b>C50%</b> | Head mass | Aquatic            | 0.399394998 | 0.351  | 0.464880913 |
| <b>C50%</b> | Head mass | Carrion            | 0.785469355 | 0.2505 | 0.996972567 |
| <b>C50%</b> | Head mass | Fruit              | 1.235734727 | 0.116  | 0.746603451 |
| <b>C50%</b> | Head mass | Generalist         | 1.394855952 | 0.083  | 0.768528267 |
| <b>C50%</b> | Head mass | Invertebrates      | 1.294450528 | 0.099  | 0.622319802 |
| <b>C50%</b> | Head mass | Nectar             | 0.103537505 | 0.45   | 0.887130345 |
| <b>C50%</b> | Head mass | Seeds              | -1.78794862 | 0.966  | 0.621889464 |
| <b>C50%</b> | Head mass | Terrestrial plants | 1.337789204 | 0.1105 | 0.978651669 |
| <b>C50%</b> | Head mass | Vertebrates        | -1.59078283 | 0.8965 | 0.805238491 |

|             |           |                    |             |        |             |
|-------------|-----------|--------------------|-------------|--------|-------------|
| <b>C75%</b> | Forelimb  | Aquatic            | 2.031428486 | 0.021  | 0.680731979 |
| <b>C75%</b> | Forelimb  | Carrion            | -0.50058542 | 0.7535 | 0.952005966 |
| <b>C75%</b> | Forelimb  | Fruit              | 0.409722509 | 0.35   | 0.609854882 |
| <b>C75%</b> | Forelimb  | Generalist         | 0.885776199 | 0.203  | 0.673089734 |
| <b>C75%</b> | Forelimb  | Invertebrates      | 1.902100316 | 0.035  | 0.677676369 |
| <b>C75%</b> | Forelimb  | Nectar             | 1.334103999 | 0.091  | 0.936996851 |
| <b>C75%</b> | Forelimb  | Seeds              | 0.884808547 | 0.204  | 0.861945325 |
| <b>C75%</b> | Forelimb  | Terrestrial plants | -0.1790324  | 0.5715 | 0.836524653 |
| <b>C75%</b> | Forelimb  | Vertebrates        | 0.709593179 | 0.3235 | 0.891051903 |
| <b>C75%</b> | Head mass | Aquatic            | 0.029524544 | 0.492  | 0.462396131 |
| <b>C75%</b> | Head mass | Carrion            | -0.62153618 | 0.7535 | 0.94349485  |
| <b>C75%</b> | Head mass | Fruit              | 1.592398957 | 0.056  | 0.730083336 |
| <b>C75%</b> | Head mass | Generalist         | 0.591514499 | 0.292  | 0.636104234 |
| <b>C75%</b> | Head mass | Invertebrates      | -0.24871595 | 0.592  | 0.464778565 |
| <b>C75%</b> | Head mass | Nectar             | 0.369183725 | 0.378  | 0.874535907 |
| <b>C75%</b> | Head mass | Seeds              | 1.146460406 | 0.134  | 0.886451949 |
| <b>C75%</b> | Head mass | Terrestrial plants | -0.04356335 | 0.5315 | 0.849834005 |
| <b>C75%</b> | Head mass | Vertebrates        | -0.49202449 | 0.6365 | 0.782906148 |
| <b>Last</b> | Forelimb  | Aquatic            | 2.380658713 | 0.008  | 0.777730929 |
| <b>Last</b> | Forelimb  | Carrion            | -0.35367384 | 0.5915 | 0.972854989 |
| <b>Last</b> | Forelimb  | Fruit              | -0.19548476 | 0.571  | 0.616913467 |
| <b>Last</b> | Forelimb  | Generalist         | 0.809048062 | 0.22   | 0.774959608 |
| <b>Last</b> | Forelimb  | Invertebrates      | 1.118030767 | 0.151  | 0.647960306 |
| <b>Last</b> | Forelimb  | Nectar             | 1.571149267 | 0.083  | 0.937362148 |
| <b>Last</b> | Forelimb  | Seeds              | 1.460411595 | 0.066  | 0.946137864 |
| <b>Last</b> | Forelimb  | Terrestrial plants | 0.815573732 | 0.2905 | 0.984563374 |
| <b>Last</b> | Forelimb  | Vertebrates        | -0.83891343 | 0.7695 | 0.782556005 |
| <b>Last</b> | Head mass | Aquatic            | -0.38528702 | 0.653  | 0.555964399 |
| <b>Last</b> | Head mass | Carrion            | -0.52951102 | 0.7535 | 0.968277497 |
| <b>Last</b> | Head mass | Fruit              | 2.063353083 | 0.019  | 0.790015108 |
| <b>Last</b> | Head mass | Generalist         | 1.762485485 | 0.044  | 0.847754698 |
| <b>Last</b> | Head mass | Invertebrates      | 0.738092283 | 0.241  | 0.617827559 |
| <b>Last</b> | Head mass | Nectar             | 1.059115723 | 0.165  | 0.907470322 |
| <b>Last</b> | Head mass | Seeds              | -0.89991425 | 0.788  | 0.739353843 |
| <b>Last</b> | Head mass | Terrestrial plants | 0.469618768 | 0.3085 | 0.967260961 |

|             |           |                     |              |        |             |
|-------------|-----------|---------------------|--------------|--------|-------------|
| <b>Last</b> | Head mass | Vertebrates         | 0.759231017  | 0.2275 | 0.822674784 |
| <b>All</b>  | Forelimb  | Aerial sallying     | 1.692885486  | 0.033  | 0.898902972 |
| <b>All</b>  | Forelimb  | Aerial screening    | 2.112968827  | 0.015  | 0.957638713 |
| <b>All</b>  | Forelimb  | Aquatic dive        | 0.976890937  | 0.19   | 0.890443196 |
| <b>All</b>  | Forelimb  | Aquatic plunge      | 0.863704152  | 0.2355 | 0.929834548 |
| <b>All</b>  | Forelimb  | Arboreal gleaning   | -0.028318013 | 0.512  | 0.69586495  |
| <b>All</b>  | Forelimb  | Bark gleaning       | 0.345158613  | 0.397  | 0.877764766 |
| <b>All</b>  | Forelimb  | Foraging generalist | 0.990049504  | 0.5005 | 1           |
| <b>All</b>  | Forelimb  | Ground foraging     | 1.293000084  | 0.123  | 0.654564549 |
| <b>All</b>  | Head mass | Aerial sallying     | 0.445481463  | 0.355  | 0.818196635 |
| <b>All</b>  | Head mass | Aerial screening    | -0.748078371 | 0.747  | 0.826578702 |
| <b>All</b>  | Head mass | Aquatic dive        | -1.037179442 | 0.816  | 0.73218412  |
| <b>All</b>  | Head mass | Aquatic plunge      | -1.587714878 | 0.9315 | 0.757441893 |
| <b>All</b>  | Head mass | Arboreal gleaning   | 1.869552573  | 0.032  | 0.807248503 |
| <b>All</b>  | Head mass | Bark gleaning       | 1.248997138  | 0.11   | 0.925958161 |
| <b>All</b>  | Head mass | Foraging generalist | -0.990049504 | 0.5005 | 1           |
| <b>All</b>  | Head mass | Ground foraging     | 1.286315805  | 0.115  | 0.660128608 |
| <b>C2</b>   | Forelimb  | Aerial sallying     | 1.249715777  | 0.12   | 0.806992291 |
| <b>C2</b>   | Forelimb  | Aerial screening    | 2.133547409  | 0.015  | 0.927080287 |
| <b>C2</b>   | Forelimb  | Aquatic dive        | 0.153687649  | 0.452  | 0.683586759 |
| <b>C2</b>   | Forelimb  | Aquatic plunge      | 0.91815476   | 0.2295 | 0.92183754  |
| <b>C2</b>   | Forelimb  | Arboreal gleaning   | 0.306494387  | 0.381  | 0.595318302 |
| <b>C2</b>   | Forelimb  | Bark gleaning       | -0.085353622 | 0.546  | 0.751523012 |
| <b>C2</b>   | Forelimb  | Foraging generalist | 0.990049504  | 0.5005 | 1           |
| <b>C2</b>   | Forelimb  | Ground foraging     | 0.721484493  | 0.245  | 0.484993018 |
| <b>C2</b>   | Head mass | Aerial sallying     | 1.437393693  | 0.078  | 0.813397274 |
| <b>C2</b>   | Head mass | Aerial screening    | 0.331786442  | 0.389  | 0.798430275 |
| <b>C2</b>   | Head mass | Aquatic dive        | -1.368416516 | 0.899  | 0.488530966 |
| <b>C2</b>   | Head mass | Aquatic plunge      | -1.990142486 | 0.9755 | 0.824105057 |
| <b>C2</b>   | Head mass | Arboreal gleaning   | 1.947616616  | 0.029  | 0.726122102 |
| <b>C2</b>   | Head mass | Bark gleaning       | 0.324326791  | 0.37   | 0.786022586 |
| <b>C2</b>   | Head mass | Foraging generalist | -0.990049504 | 0.5005 | 1           |
| <b>C2</b>   | Head mass | Ground foraging     | 1.386934208  | 0.104  | 0.581900374 |
| <b>C25%</b> | Forelimb  | Aerial sallying     | 1.517920158  | 0.065  | 0.831133964 |
| <b>C25%</b> | Forelimb  | Aerial screening    | 1.722866429  | 0.042  | 0.888437248 |

|             |           |                     |              |        |             |
|-------------|-----------|---------------------|--------------|--------|-------------|
| <b>C25%</b> | Forelimb  | Aquatic dive        | 1.405485099  | 0.07   | 0.881230425 |
| <b>C25%</b> | Forelimb  | Aquatic plunge      | 0.920086801  | 0.1515 | 0.905225223 |
| <b>C25%</b> | Forelimb  | Arboreal gleaning   | 0.808776984  | 0.225  | 0.629582937 |
| <b>C25%</b> | Forelimb  | Bark gleaning       | -1.740914399 | 0.961  | 0.528152583 |
| <b>C25%</b> | Forelimb  | Foraging generalist | 0.990049504  | 0.5005 | 1           |
| <b>C25%</b> | Forelimb  | Ground foraging     | 1.01474541   | 0.173  | 0.46601881  |
| <b>C25%</b> | Head mass | Aerial sallying     | 0.376026522  | 0.361  | 0.720463798 |
| <b>C25%</b> | Head mass | Aerial screening    | -0.238544167 | 0.572  | 0.668174998 |
| <b>C25%</b> | Head mass | Aquatic dive        | -1.615733559 | 0.95   | 0.557728211 |
| <b>C25%</b> | Head mass | Aquatic plunge      | -1.425716555 | 0.8865 | 0.555930741 |
| <b>C25%</b> | Head mass | Arboreal gleaning   | 2.399361398  | 0.006  | 0.75223333  |
| <b>C25%</b> | Head mass | Bark gleaning       | 0.400405356  | 0.346  | 0.727313747 |
| <b>C25%</b> | Head mass | Foraging generalist | -0.990049504 | 0.5005 | 1           |
| <b>C25%</b> | Head mass | Ground foraging     | 0.401202886  | 0.348  | 0.41546886  |
| <b>C50%</b> | Forelimb  | Aerial sallying     | -0.48392651  | 0.686  | 0.703289328 |
| <b>C50%</b> | Forelimb  | Aerial screening    | 2.799705558  | 0.002  | 0.948449162 |
| <b>C50%</b> | Forelimb  | Aquatic dive        | 1.206216883  | 0.149  | 0.859345247 |
| <b>C50%</b> | Forelimb  | Aquatic plunge      | 0.49114258   | 0.3645 | 0.933478785 |
| <b>C50%</b> | Forelimb  | Arboreal gleaning   | -0.001012341 | 0.501  | 0.596764161 |
| <b>C50%</b> | Forelimb  | Bark gleaning       | -0.207442014 | 0.554  | 0.849380737 |
| <b>C50%</b> | Forelimb  | Foraging generalist | 0.990049504  | 0.5005 | 1           |
| <b>C50%</b> | Forelimb  | Ground foraging     | 2.454219364  | 0.005  | 0.666894747 |
| <b>C50%</b> | Head mass | Aerial sallying     | 0.312825275  | 0.398  | 0.763841595 |
| <b>C50%</b> | Head mass | Aerial screening    | -0.205878574 | 0.57   | 0.736766846 |
| <b>C50%</b> | Head mass | Aquatic dive        | -0.525309714 | 0.653  | 0.608061502 |
| <b>C50%</b> | Head mass | Aquatic plunge      | -1.286802277 | 0.8345 | 0.706598969 |
| <b>C50%</b> | Head mass | Arboreal gleaning   | 1.76740392   | 0.039  | 0.712956822 |
| <b>C50%</b> | Head mass | Bark gleaning       | -1.246034479 | 0.879  | 0.779317907 |
| <b>C50%</b> | Head mass | Foraging generalist | -0.990049504 | 0.5005 | 1           |
| <b>C50%</b> | Head mass | Ground foraging     | 2.584698199  | 0.003  | 0.685508722 |
| <b>C75%</b> | Forelimb  | Aerial sallying     | 1.525526475  | 0.07   | 0.838783255 |
| <b>C75%</b> | Forelimb  | Aerial screening    | 2.19784872   | 0.015  | 0.892082374 |
| <b>C75%</b> | Forelimb  | Aquatic dive        | 0.895019328  | 0.202  | 0.905461199 |
| <b>C75%</b> | Forelimb  | Aquatic plunge      | 0.762052998  | 0.2745 | 0.937098254 |
| <b>C75%</b> | Forelimb  | Arboreal gleaning   | 1.297084519  | 0.112  | 0.637834347 |

|             |           |                     |              |        |             |
|-------------|-----------|---------------------|--------------|--------|-------------|
| <b>C75%</b> | Forelimb  | Bark gleaning       | 1.251065072  | 0.117  | 0.918386211 |
| <b>C75%</b> | Forelimb  | Foraging generalist | 0.990049504  | 0.5005 | 1           |
| <b>C75%</b> | Forelimb  | Ground foraging     | 1.616023241  | 0.05   | 0.563834453 |
| <b>C75%</b> | Head mass | Aerial sallying     | 0.555765449  | 0.305  | 0.76719509  |
| <b>C75%</b> | Head mass | Aerial screening    | -0.763971878 | 0.772  | 0.624231289 |
| <b>C75%</b> | Head mass | Aquatic dive        | -0.874692986 | 0.822  | 0.750501745 |
| <b>C75%</b> | Head mass | Aquatic plunge      | -0.138423856 | 0.5325 | 0.803894526 |
| <b>C75%</b> | Head mass | Arboreal gleaning   | 2.080549924  | 0.014  | 0.704794926 |
| <b>C75%</b> | Head mass | Bark gleaning       | 1.742490277  | 0.034  | 0.95128162  |
| <b>C75%</b> | Head mass | Foraging generalist | -0.990049504 | 0.5005 | 1           |
| <b>C75%</b> | Head mass | Ground foraging     | 2.324715181  | 0.003  | 0.624417022 |
| <b>Last</b> | Forelimb  | Aerial sallying     | 1.04780167   | 0.156  | 0.795097409 |
| <b>Last</b> | Forelimb  | Aerial screening    | 0.964436145  | 0.182  | 0.840856497 |
| <b>Last</b> | Forelimb  | Aquatic dive        | 0.283123726  | 0.385  | 0.915626767 |
| <b>Last</b> | Forelimb  | Aquatic plunge      | 0.179830957  | 0.4755 | 0.906958206 |
| <b>Last</b> | Forelimb  | Arboreal gleaning   | 0.265647529  | 0.4    | 0.581249043 |
| <b>Last</b> | Forelimb  | Bark gleaning       | 0.461836109  | 0.376  | 0.871217417 |
| <b>Last</b> | Forelimb  | Foraging generalist | 0.990049504  | 0.5005 | 1           |
| <b>Last</b> | Forelimb  | Ground foraging     | 2.405228414  | 0.006  | 0.665055753 |
| <b>Last</b> | Head mass | Aerial sallying     | 0.482069708  | 0.335  | 0.742358142 |
| <b>Last</b> | Head mass | Aerial screening    | -0.938530057 | 0.803  | 0.686202114 |
| <b>Last</b> | Head mass | Aquatic dive        | -0.602276492 | 0.683  | 0.858808112 |
| <b>Last</b> | Head mass | Aquatic plunge      | -0.899951949 | 0.7635 | 0.854636907 |
| <b>Last</b> | Head mass | Arboreal gleaning   | 1.88229622   | 0.026  | 0.705352289 |
| <b>Last</b> | Head mass | Bark gleaning       | -0.096051051 | 0.528  | 0.827379316 |
| <b>Last</b> | Head mass | Foraging generalist | -0.990049504 | 0.5005 | 1           |
| <b>Last</b> | Head mass | Ground foraging     | 0.800555047  | 0.212  | 0.52437068  |
| <b>All</b>  | Forelimb  | Flesh               | 1.817632108  | 0.032  | 0.709140294 |
| <b>All</b>  | Forelimb  | Non-flesh           | 1.509241226  | 0.068  | 0.625038717 |
| <b>All</b>  | Head mass | Flesh               | -0.551707067 | 0.675  | 0.448153431 |
| <b>All</b>  | Head mass | Non-flesh           | 0.52113481   | 0.331  | 0.543667292 |
| <b>C2</b>   | Forelimb  | Flesh               | 1.208451597  | 0.142  | 0.514220583 |
| <b>C2</b>   | Forelimb  | Non-flesh           | 1.565020074  | 0.052  | 0.497801255 |
| <b>C2</b>   | Head mass | Flesh               | -0.985155892 | 0.832  | 0.313282869 |
| <b>C2</b>   | Head mass | Non-flesh           | 1.168378439  | 0.134  | 0.462715335 |



|             |           |             |              |       |             |
|-------------|-----------|-------------|--------------|-------|-------------|
| <b>C25%</b> | Forelimb  | Flesh       | -0.265180082 | 0.598 | 0.32675704  |
| <b>C25%</b> | Forelimb  | Non-flesh   | 2.250378931  | 0.003 | 0.586354954 |
| <b>C25%</b> | Head mass | Flesh       | -0.113547851 | 0.526 | 0.338693338 |
| <b>C25%</b> | Head mass | Non-flesh   | 0.646840131  | 0.286 | 0.413592477 |
| <b>C50%</b> | Forelimb  | Flesh       | 1.404395633  | 0.076 | 0.499457833 |
| <b>C50%</b> | Forelimb  | Non-flesh   | 2.899177405  | 0.002 | 0.583228639 |
| <b>C50%</b> | Head mass | Flesh       | -0.48069518  | 0.673 | 0.341058306 |
| <b>C50%</b> | Head mass | Non-flesh   | 1.250798887  | 0.108 | 0.458332229 |
| <b>C75%</b> | Forelimb  | Flesh       | 1.910659546  | 0.021 | 0.598121974 |
| <b>C75%</b> | Forelimb  | Non-flesh   | 2.094583728  | 0.013 | 0.490240632 |
| <b>C75%</b> | Head mass | Flesh       | 0.359481322  | 0.377 | 0.451325448 |
| <b>C75%</b> | Head mass | Non-flesh   | 0.647631221  | 0.279 | 0.388458649 |
| <b>Last</b> | Forelimb  | Flesh       | 2.436024273  | 0.005 | 0.706408642 |
| <b>Last</b> | Forelimb  | Non-flesh   | 3.089646007  | 0.002 | 0.578682299 |
| <b>Last</b> | Head mass | Flesh       | -0.739565263 | 0.77  | 0.459699037 |
| <b>Last</b> | Head mass | Non-flesh   | 2.568452081  | 0.005 | 0.529643735 |
| <b>All</b>  | Forelimb  | Aquatic     | 1.908562777  | 0.032 | 0.738722346 |
| <b>All</b>  | Forelimb  | Non-aquatic | 1.962282886  | 0.02  | 0.637999192 |
| <b>All</b>  | Head mass | Aquatic     | 0.672700985  | 0.269 | 0.615857332 |
| <b>All</b>  | Head mass | Non-aquatic | 0.920862648  | 0.218 | 0.55017389  |
| <b>C2</b>   | Forelimb  | Aquatic     | 2.328453122  | 0.005 | 0.741497892 |
| <b>C2</b>   | Forelimb  | Non-aquatic | 2.159464373  | 0.008 | 0.553317989 |
| <b>C2</b>   | Head mass | Aquatic     | 1.941431618  | 0.021 | 0.675628347 |
| <b>C2</b>   | Head mass | Non-aquatic | 1.762694839  | 0.031 | 0.492935287 |
| <b>C25%</b> | Forelimb  | Aquatic     | 0.444003145  | 0.334 | 0.448252591 |
| <b>C25%</b> | Forelimb  | Non-aquatic | 2.227787518  | 0.003 | 0.565265801 |
| <b>C25%</b> | Head mass | Aquatic     | 0.277571474  | 0.402 | 0.430491754 |
| <b>C25%</b> | Head mass | Non-aquatic | 1.616474736  | 0.05  | 0.485621598 |
| <b>C50%</b> | Forelimb  | Aquatic     | 1.198754212  | 0.106 | 0.541839321 |
| <b>C50%</b> | Forelimb  | Non-aquatic | 2.926304814  | 0.002 | 0.537195819 |
| <b>C50%</b> | Head mass | Aquatic     | 0.143648842  | 0.443 | 0.432780115 |
| <b>C50%</b> | Head mass | Non-aquatic | 1.492804429  | 0.075 | 0.450264853 |
| <b>C75%</b> | Forelimb  | Aquatic     | 2.315032542  | 0.011 | 0.692682326 |
| <b>C75%</b> | Forelimb  | Non-aquatic | 1.829554878  | 0.034 | 0.44359345  |
| <b>C75%</b> | Head mass | Aquatic     | 0.397567519  | 0.345 | 0.506243013 |

|             |           |             |             |       |             |
|-------------|-----------|-------------|-------------|-------|-------------|
| <b>C75%</b> | Head mass | Non-aquatic | 0.870474501 | 0.193 | 0.383496098 |
| <b>Last</b> | Forelimb  | Aquatic     | 2.193574387 | 0.014 | 0.765995195 |
| <b>Last</b> | Forelimb  | Non-aquatic | 3.094361412 | 0.002 | 0.565989793 |
| <b>Last</b> | Head mass | Aquatic     | 0.646470873 | 0.266 | 0.634200679 |
| <b>Last</b> | Head mass | Non-aquatic | 2.67094735  | 0.004 | 0.514240179 |

**Table S6.** GIC and log-likelihood values for equal and multi-rates models of cervical evolution across the neck.

| <b>Model</b>                     | <b>GIC</b> | <b>logLik</b> |
|----------------------------------|------------|---------------|
| <b>C2 equal rates diet</b>       | -1583821   | 796918.4      |
| <b>C2 multi-rates diet</b>       | -1599521   | 804785.8      |
| <b>C25% equal rates diet</b>     | -1599312   | 804648.8      |
| <b>C25% multi-rates diet</b>     | -1614751   | 812368.5      |
| <b>C50% equal rates diet</b>     | -1643529   | 826709.4      |
| <b>C50% multi-rates diet</b>     | -1671206   | 840590.3      |
| <b>C75% equal rates diet</b>     | -1624524   | 817158.1      |
| <b>C75% multi-rates diet</b>     | -1642845   | 826362.4      |
| <b>Last equal rates diet</b>     | -1550408   | 780185.1      |
| <b>Last multi-rates diet</b>     | -1567778   | 788876.8      |
| <b>C2 equal rates foraging</b>   | -1583821   | 796918.4      |
| <b>C2 multi-rates foraging</b>   | -1603531   | 806754.5      |
| <b>C25% equal rates foraging</b> | -1599312   | 804648.8      |
| <b>C25% multi-rates foraging</b> | -1618821   | 814383.8      |
| <b>C50% equal rates foraging</b> | -1643529   | 826709.4      |
| <b>C50% multi-rates foraging</b> | -1661518   | 835709.7      |
| <b>C75% equal rates foraging</b> | -1624524   | 817158.1      |
| <b>C75% multi-rates foraging</b> | -1643723   | 826745.5      |
| <b>Last equal rates foraging</b> | -1550408   | 780185.1      |
| <b>Last multi-rates foraging</b> | -1573061   | 791508.3      |
| <b>C2 equal rates flesh</b>      | -1583821   | 796918.4      |
| <b>C2 multi-rates flesh</b>      | -1593901   | 801943.8      |
| <b>C25% equal rates flesh</b>    | -1599312   | 804648.8      |
| <b>C25% multi-rates flesh</b>    | -1607209   | 808562.5      |

|                               |          |          |
|-------------------------------|----------|----------|
| <b>C50% equal rates flesh</b> | -1643529 | 826709.4 |
| <b>C50% multi-rates flesh</b> | -1645612 | 827742.1 |
| <b>C75% equal rates flesh</b> | -1624524 | 817158.1 |
| <b>C75% multi-rates flesh</b> | -1639129 | 824468.3 |
| <b>Last equal rates flesh</b> | -1550408 | 780185.1 |
| <b>Last multi-rates flesh</b> | -1559618 | 784756.5 |
| <b>C2 equal rates water</b>   | -1583821 | 796918.4 |
| <b>C2 multi-rates water</b>   | -1586001 | 797995   |
| <b>C25% equal rates water</b> | -1599312 | 804648.8 |
| <b>C25% multi-rates water</b> | -1599461 | 804724.3 |
| <b>C50% equal rates water</b> | -1643529 | 826709.4 |
| <b>C50% multi-rates water</b> | -1643960 | 826924.6 |
| <b>C75% equal rates water</b> | -1624524 | 817158.1 |
| <b>C75% multi-rates water</b> | -1627022 | 818394.5 |
| <b>Last equal rates water</b> | -1550408 | 780185.1 |
| <b>Last multi-rates water</b> | -1550514 | 780238.6 |

**Table S7.** Average evolutionary rates per ecological group, averaged across all vertebral regions.

| <b>Ecology</b>      | <b>Grouping</b> | <b>Average rate</b> |
|---------------------|-----------------|---------------------|
| Foraging generalist | Foraging        | 9.95E-16            |
| Aquatic surface     | Foraging        | 6.85E-13            |
| Vertebrates         | Diet            | 1.96E-12            |
| Carrion             | Diet            | 2.49E-12            |
| Aerial screening    | Foraging        | 2.17E-08            |
| Flesh               | Flesh           | 1.09E-07            |
| Aerial sallying     | Foraging        | 2.02E-07            |
| Aquatic             | Aquatic         | 2.51E-07            |
| Aquatic animals     | Diet            | 2.63E-07            |
| Terrestrial plants  | Diet            | 2.9E-07             |
| Non-aquatic         | Aquatic         | 3.05E-07            |
| Bark gleaning       | Foraging        | 3.23E-07            |

|                   |          |          |
|-------------------|----------|----------|
| Seeds             | Diet     | 3.4E-07  |
| Aquatic dive      | Foraging | 3.64E-07 |
| Nectar            | Diet     | 3.67E-07 |
| Aquatic plunge    | Foraging | 3.8E-07  |
| Non-flesh         | Flesh    | 4.76E-07 |
| Generalist        | Diet     | 5.17E-07 |
| Invertebrates     | Diet     | 5.29E-07 |
| Fruit             | Diet     | 5.47E-07 |
| Ground foraging   | Foraging | 5.59E-07 |
| Arboreal gleaning | Foraging | 5.75E-07 |

**Table S8.** Evolutionary rates per dietary group across all vertebral regions.

| <b>Group</b>               | <b>C2</b> | <b>C25%</b> | <b>C50%</b> | <b>C75%</b> | <b>Last</b> |
|----------------------------|-----------|-------------|-------------|-------------|-------------|
| <b>Terrestrial plants</b>  | 2.45E-07  | 4.79E-07    | 1.20E-07    | 3.46E-07    | 2.60E-07    |
| <b>Nectar</b>              | 4.28E-07  | 4.12E-07    | 2.72E-07    | 3.01E-07    | 4.20E-07    |
| <b>Seeds</b>               | 3.28E-07  | 3.29E-07    | 3.56E-07    | 3.22E-07    | 3.63E-07    |
| <b>Aquatic animals</b>     | 2.48E-07  | 3.52E-07    | 3.72E-07    | 1.21E-07    | 2.22E-07    |
| <b>Generalist</b>          | 4.61E-07  | 5.22E-07    | 5.00E-07    | 5.72E-07    | 5.29E-07    |
| <b>Fruit</b>               | 6.82E-07  | 1.89E-07    | 5.24E-07    | 4.13E-07    | 9.25E-07    |
| <b>Carrion</b>             | 1.62E-12  | 3.33E-14    | 2.32E-14    | 6.50E-13    | 1.01E-11    |
| <b>Invertebrates</b>       | 7.24E-07  | 5.96E-07    | 8.63E-08    | 3.93E-07    | 8.45E-07    |
| <b>Vertebrates</b>         | 2.14E-13  | 3.31E-15    | 9.60E-12    | 1.24E-15    | 2.70E-15    |
| <b>Ground foraging</b>     | 7.07E-07  | 5.12E-07    | 3.15E-07    | 4.59E-07    | 8.01E-07    |
| <b>Foraging generalist</b> | 1.97E-18  | 4.23E-17    | 1.39E-16    | 1.31E-16    | 4.66E-15    |
| <b>Aquatic plunge</b>      | 5.09E-07  | 7.00E-07    | 2.32E-07    | 1.29E-07    | 3.27E-07    |
| <b>Aquatic dive</b>        | 2.40E-07  | 2.29E-07    | 3.14E-07    | 5.22E-07    | 5.15E-07    |
| <b>Arboreal gleaning</b>   | 6.78E-07  | 5.96E-07    | 4.08E-07    | 4.27E-07    | 7.64E-07    |
| <b>Aerial screening</b>    | 2.05E-08  | 8.62E-09    | 2.02E-08    | 1.91E-08    | 4.01E-08    |
| <b>Aerial sallying</b>     | 2.48E-07  | 2.10E-07    | 1.64E-07    | 1.84E-07    | 2.06E-07    |
| <b>Bark gleaning</b>       | 4.81E-07  | 4.97E-07    | 1.29E-07    | 1.80E-07    | 3.30E-07    |
| <b>Aquatic surface</b>     | 6.77E-14  | 2.64E-12    | 1.20E-13    | 1.41E-13    | 4.54E-13    |
| <b>Non-flesh</b>           | 5.51E-07  | 4.83E-07    | 2.75E-07    | 4.29E-07    | 6.43E-07    |

|                    |          |          |          |          |          |
|--------------------|----------|----------|----------|----------|----------|
| <b>Flesh</b>       | 1.16E-07 | 1.14E-07 | 1.08E-07 | 8.32E-08 | 1.23E-07 |
| <b>Non-aquatic</b> | 3.91E-07 | 2.78E-07 | 1.95E-07 | 3.01E-07 | 3.60E-07 |
| <b>Aquatic</b>     | 1.59E-07 | 3.17E-07 | 2.50E-07 | 1.19E-07 | 4.11E-07 |

**Table S9.** Evolutionary rates per vertebral region.

| <b>Groups</b>   | <b>Observed Rate Ratio</b> | <b>Effect Size</b> | <b>C2 rate</b> | <b>C25% rate</b> | <b>C50% rate</b> | <b>C75% rate</b> | <b>Last rate</b>   | <b>P</b>    |
|-----------------|----------------------------|--------------------|----------------|------------------|------------------|------------------|--------------------|-------------|
| <b>Vertebra</b> | 1.809                      | 11.2123            | 3.15861E-07    | 2.82461E-07      | 2.02411E-07      | 2.42699E-07      | <b>3.66155E-07</b> | 0.000999001 |
