# Supplementary material for: The neck as a keystone structure in avian macroevolution and mosaicism
Source: PubMed Central journal article supplement (PMC10576348; doi:10.1186/s12915-023-01715-x), 2023-10-13
Supplement: 12915_2023_1715_MOESM2_ESM.pdf [file 12915_2023_1715_MOESM2_ESM.pdf]

## **Additional File 2 for Marek & Felice ‘The neck as a keystone structure in avian macroevolution and mosaicism’**

### **Landmark scheme for cervical vertebrae**

#### **Invariant landmarks**

- 1 - Maximum curvature of the dorsal and right part of the cranial articular surface
- 2 - Maximum curvature of the dorsal and left part of the cranial articular surface
- 3 - Maximum curvature of the dorsal and left part of the caudal articular surface
- 4 - Maximum curvature of the dorsal and right part of the caudal articular surface
- 5 - Junction of the vertebral arch and left prezygopophyseal facet
- 7 - Junction of the vertebral arch and right prezygopophyseal facet
- 9 - Anterior junction of the vertebral arch and right postzygopophyseal facet
- 10 - Posterior junction of the vertebral arch and right postzygopophyseal facet
- 11 - Anterior junction of the vertebral arch and left postzygopophyseal facet
- 12 - Posterior junction of the vertebral arch and left postzygopophyseal facet
- 15 - Caudal maximum curvature of vertebral arch
- 16 - Cranial maximum curvature of vertebral arch
- 17 - Middle ventral curvature of the cranial articular surface
- 18 - Middle ventral curvature of the caudal articular surface
- 19 - Middle dorsal curvature of the cranial articular surface
- 20 - Middle dorsal curvature of the caudal articular surface

#### **Variant landmarks**

- 6 - Lateral most extent of the left transverse process
- 8 - Lateral most extent of the right transverse process
- 13 - Caudal most extent of the left costal process/rib
- 14 - Caudal most extent of the right costal process/rib

#### **Landmarks forming curves**

- (1) 1-19 - Right dorsal outline of cranial articular surface
- (2) 19-2 - Left dorsal outline of cranial articular surface
- (3) 2-17 - Left lateral and ventral outline of cranial articular surface
- (4) 17-1 - Right ventral and lateral outline of cranial articular surface
- (5) 4-20 - Right dorsal outline of caudal articular surface
- (6) 20-3 - Left dorsal outline of caudal articular surface
- (7) 3-18 - Left lateral and ventral outline of caudal articular surface
- (8) 18-4 - Right ventral and lateral outline of caudal articular surface
- (9) 5-16-7 - Border of the dorsocranial face of the vertebral arch
- (10) 11-15-9 - Border of the dorsocaudal face of the vertebral arch
- (11) 10-4 - Border of the right ventrocaudal face of the vertebral arch
- (12) 12-3 - Border of the left ventrocaudal face of the vertebral arch
- (13) 5 - Outline of the left prezygopophyseal facet
- (14) 7 - Outline of the right prezygopophyseal facet
- (15) 11 - Outline of left prezygopophyseal facet
- (16) 9 - Outline of right prezygopophyseal facet
- (17) 15-16 - Central line along the dorsal face of the vertebral arch
- (18) 17-18 - Central line along the ventral face of the vertebral body
- (19) 19-17 - Central line along the cranial articular surface
- (20) 18-20 - Central line along the caudal articular surface

#### **Landmarks forming patches**

- 1-19-2-17-1 - Cranial articular surface
- 4-20-3-18-4 - Caudal articular surface

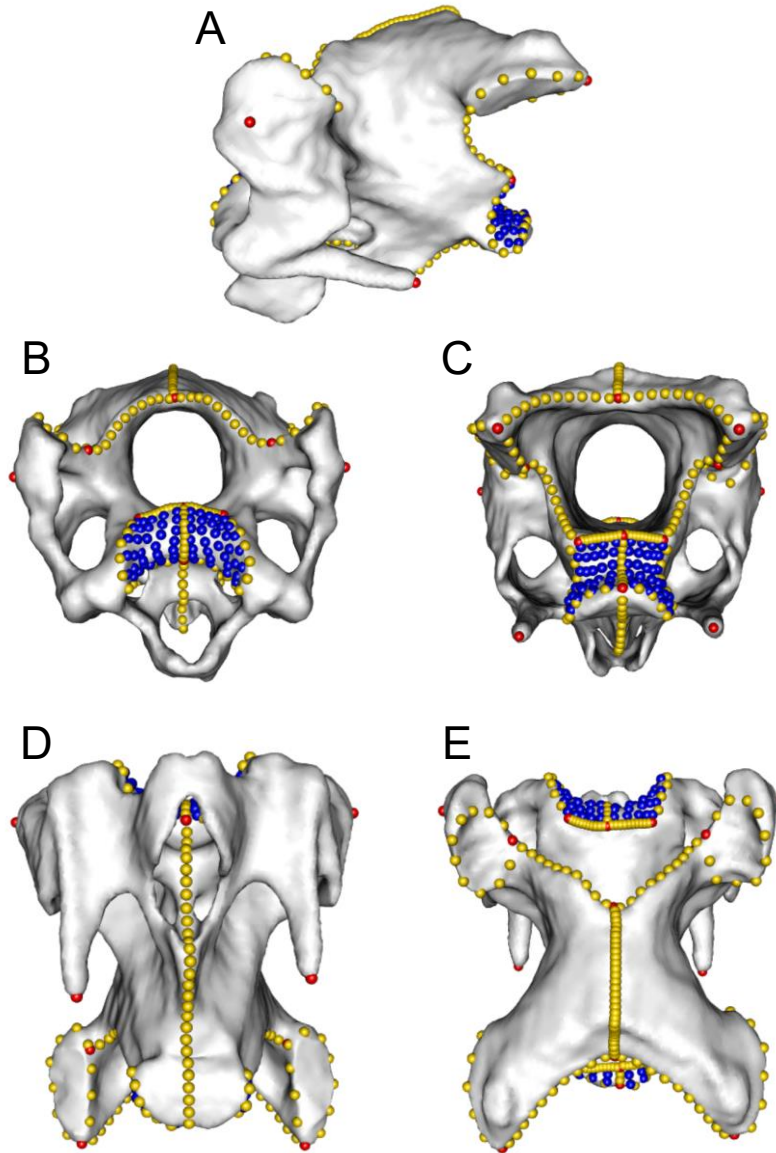

**Figure S1.** Landmarks scheme used for cervical vertebrae. Red landmarks are fixed (invariant and variant), gold landmarks are landmarks that form curves, blue landmarks are landmarks that form patches. Cervical vertebrae (C75%) of *Basilornis mirandus* in A) left lateral view, B) anterior view, C) posterior view, D) ventral view, E) dorsal view.
